# Supplementary material
Source: PubMed Central journal article supplement (PMC9502057)
Supplement: mmc1.pdf [file mmc1.pdf]

**Supplemental information**

**Extent to which array genotyping and  
imputation with large reference panels  
approximate deep whole-genome sequencing**

**Sarah C. Hanks, Lukas Forer, Sebastian Schönherr, Jonathon LeFaive, Taylor Martins, Ryan Welch, Sarah A. Gagliano Taliun, David Braff, Jill M. Johnsen, Eimear E. Kenny, Barbara A. Konkle, Markku Laakso, Ruth F.J. Loos, Steven McCarroll, Carlos Pato, Michele T. Pato, Albert V. Smith, NHLBI Trans-Omics for Precision Medicine (TOPMed) Consortium, Michael Boehnke, Laura J. Scott, and Christian Fuchsberger**

## Supplemental Figures

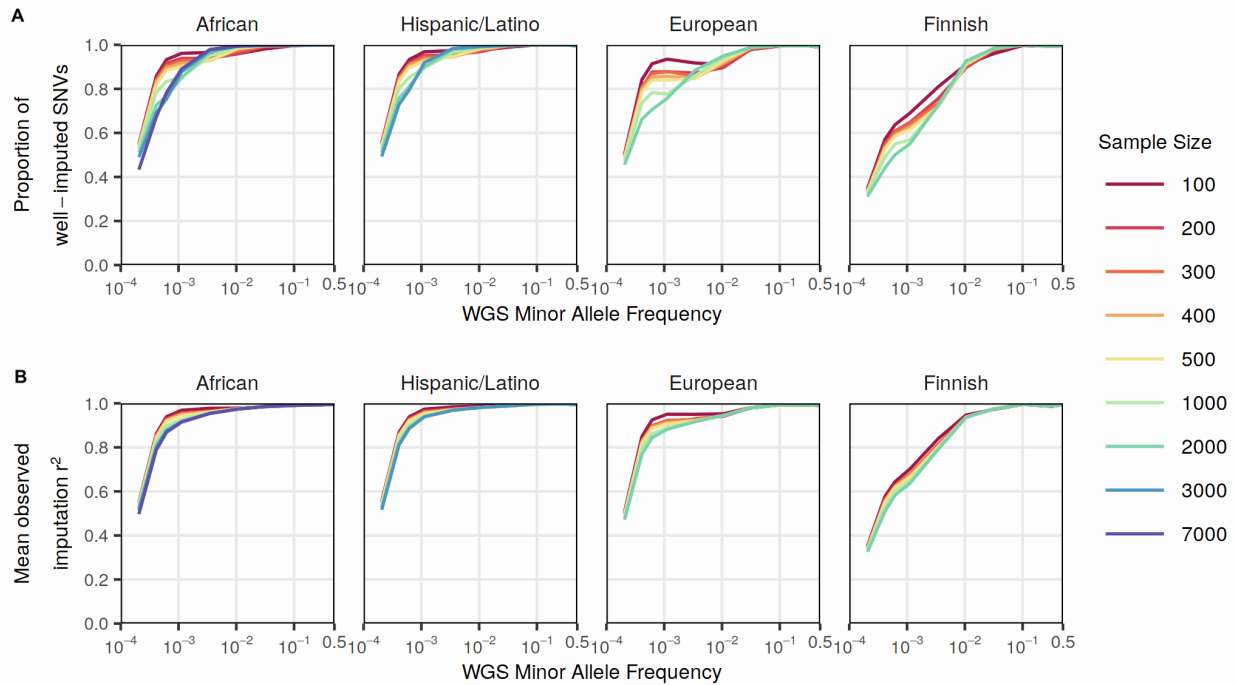

**Figure S1. Effect of sample size on imputation quality metrics.** Random subsets of individuals were taken from each of the WGS studies as the total sample size of unrelated individuals allowed (up to 7,000 for African, 3,000 for Hispanic/Latino, and 2,000 for European and Finnish). Imputation was performed with the Omni 2.5M array and the TOPMed imputation reference panel. A. The proportion of sequenced biallelic SNVs that are well-imputed ( $r^2 > 0.8$ ) by sample size. B. The mean  $r^2$  by sample size. In both plots, the x-axes show minor allele frequency (MAF) calculated separately by study based on the 2,429 samples used in the main analyses. Sequenced biallelic SNVs not present in reference panels were assigned  $r^2 = 0$ . Biallelic SNVs were then aggregated by MAF bins of width 0.00025 MAF for MAF between 0.0002 and 0.002 and of size 0.001 MAF for MAF > 0.002; those plotted here correspond to singletons, doubletons, and tripletons in each study, as well as those with mean MAF closest to the values 0.001, 0.0032, 0.01, 0.032, 0.1, 0.32, and 0.5.

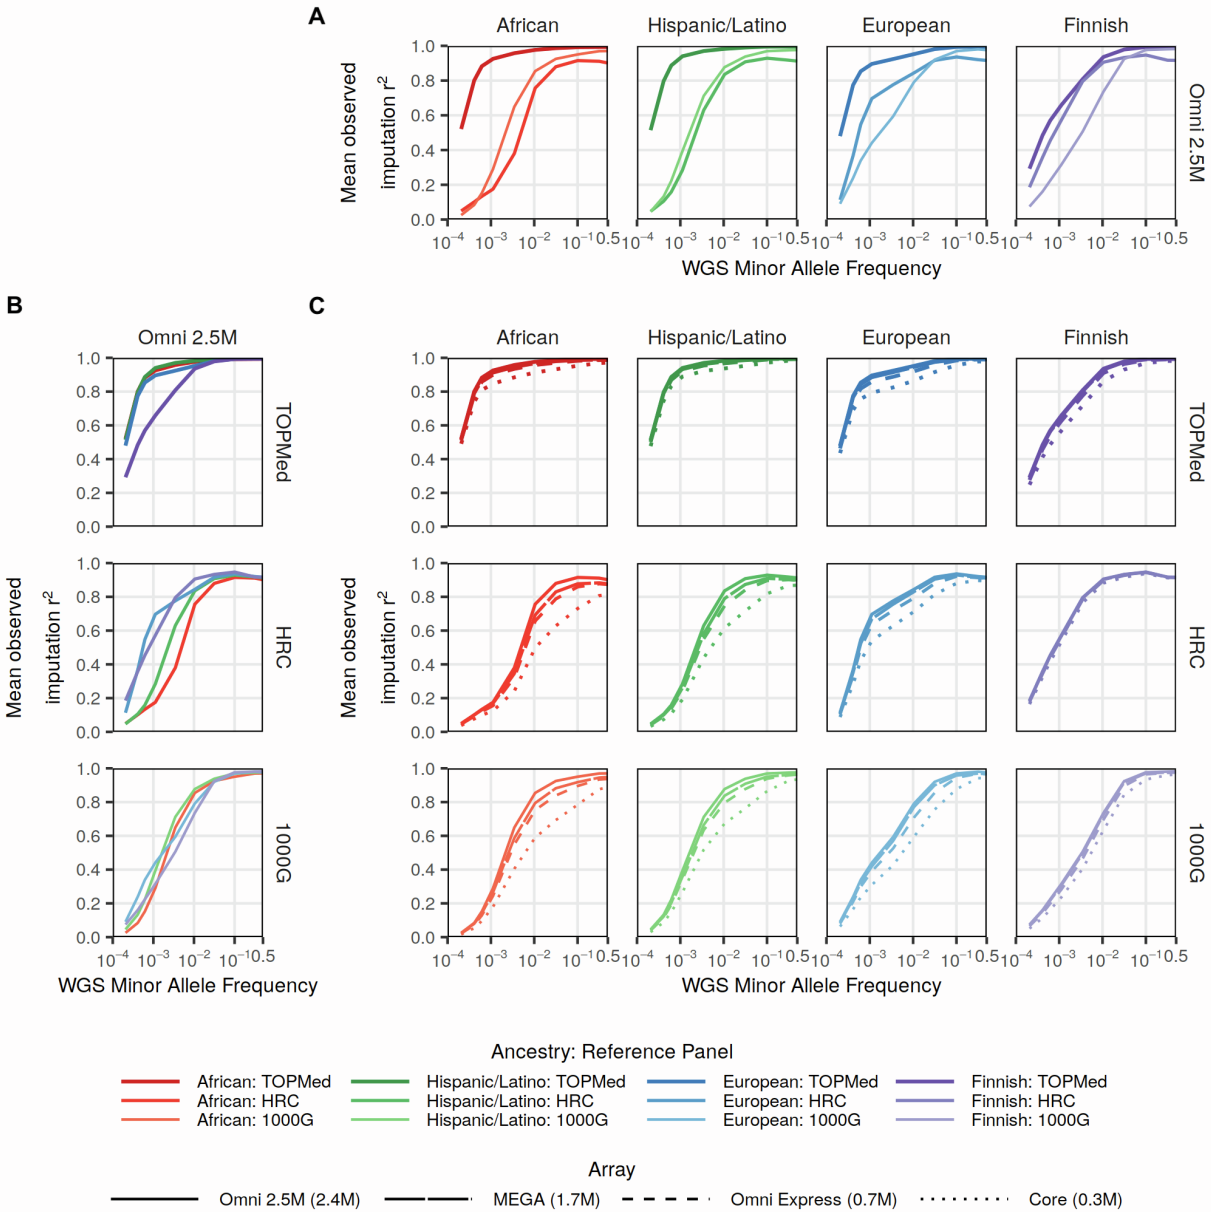

**Figure S2. Mean observed imputation  $r^2$  of biallelic SNVs by reference panel, study ancestry, and genotyping array.** The mean observed imputation  $r^2$  with the TOPMed, HRC, and 1000G imputation reference panels. A. Comparison across the reference panels using the Illumina Omni 2.5M array. B. Comparison across the four studies using the Illumina Omni 2.5M array. C. Comparison across four Illumina genotyping arrays: Omni 2.5M, MEGA, Omni Express, and Core by ancestry (columns) and imputation reference panels (rows). In all plots, the x-axes show minor allele frequency (MAF) calculated separately by study. Sequenced biallelic SNVs not present in reference panels were assigned  $r^2=0$ . Biallelic SNVs were then aggregated by MAF bins of width 0.00025 MAF for MAF between 0.0002 and 0.002 and of size 0.001 MAF for MAF > 0.002; those plotted here correspond to singletons, doubletons, and tripletons in each study, as well as those with mean MAF closest to the values 0.001, 0.0032, 0.01, 0.032, 0.1, 0.32, and 0.5.

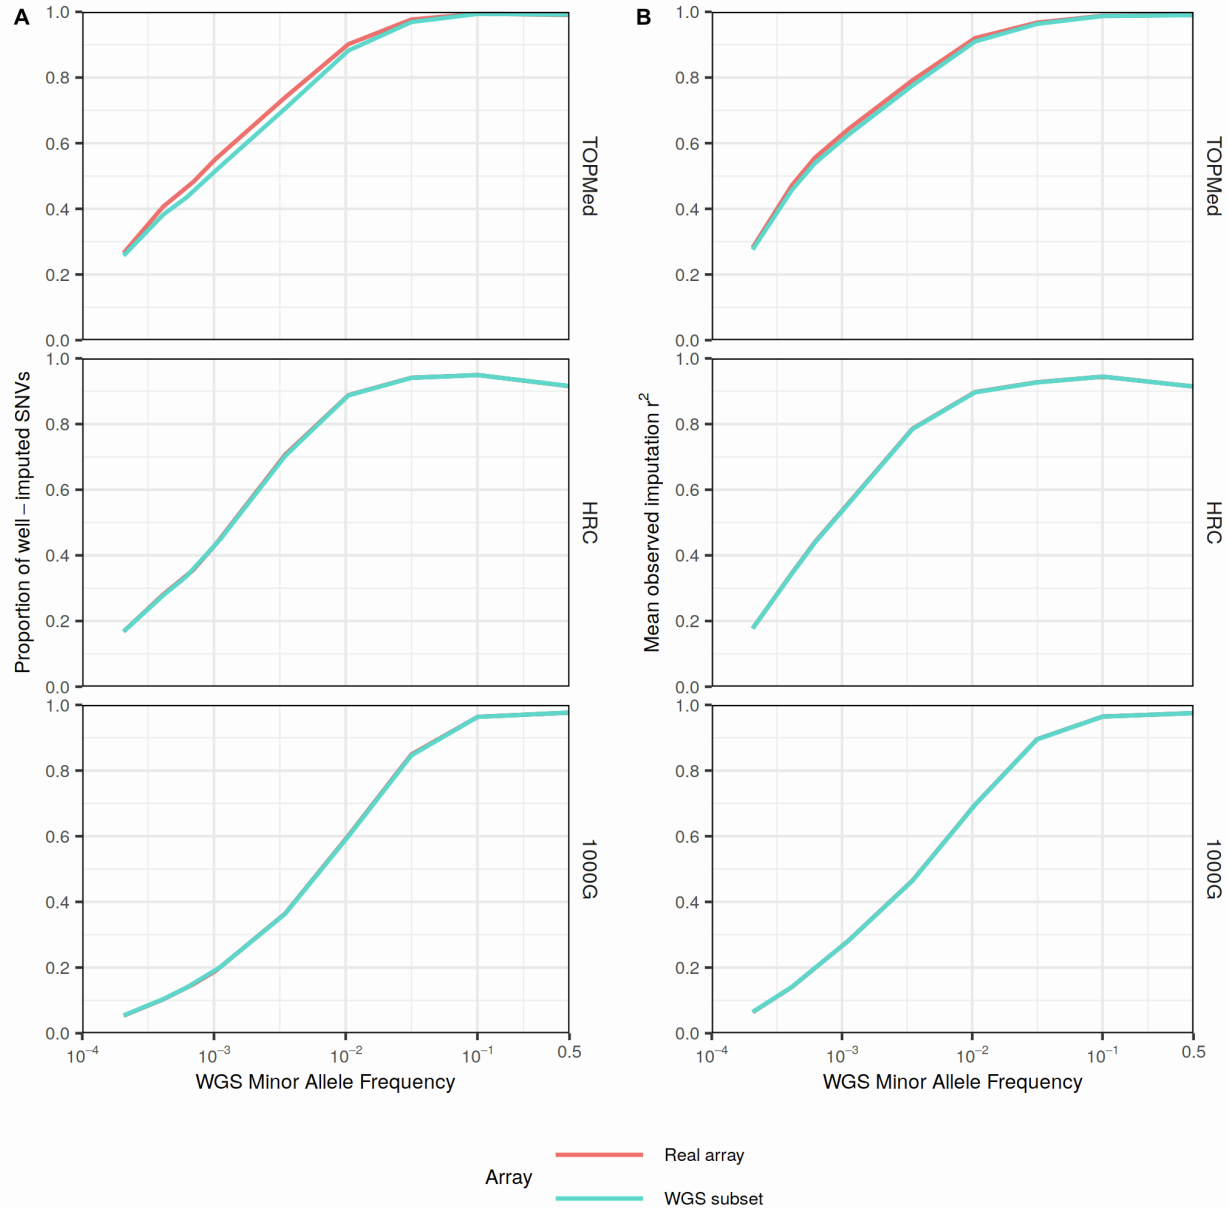

**Figure S3. Imputation quality of biallelic SNVs by reference panel using WGS-based and real Illumina OmniExpress arrays.** A. The proportion of sequenced biallelic SNVs imputed from real array data (red line) or from WGS-based array (blue line) in the Finnish study that are well-imputed ( $r^2 > 0.8$ ) by imputation reference panel. B. The mean observed imputation  $r^2$  for the same variants. In all plots, the x-axes show minor allele frequency (MAF) calculated separately by study. Variants were aggregated by MAF bins of size 0.00025 MAF for MAF between 0.0002 and 0.002 and of size 0.001 MAF for MAF > 0.002; those plotted here correspond to singletons, doubletons, and tripletons in each study, as well as those with mean MAF closest to the values 0.001, 0.0032, 0.01, 0.316, 0.1, and 0.5. The lines appear entirely overlapping for the HRC and 1000G reference panels.

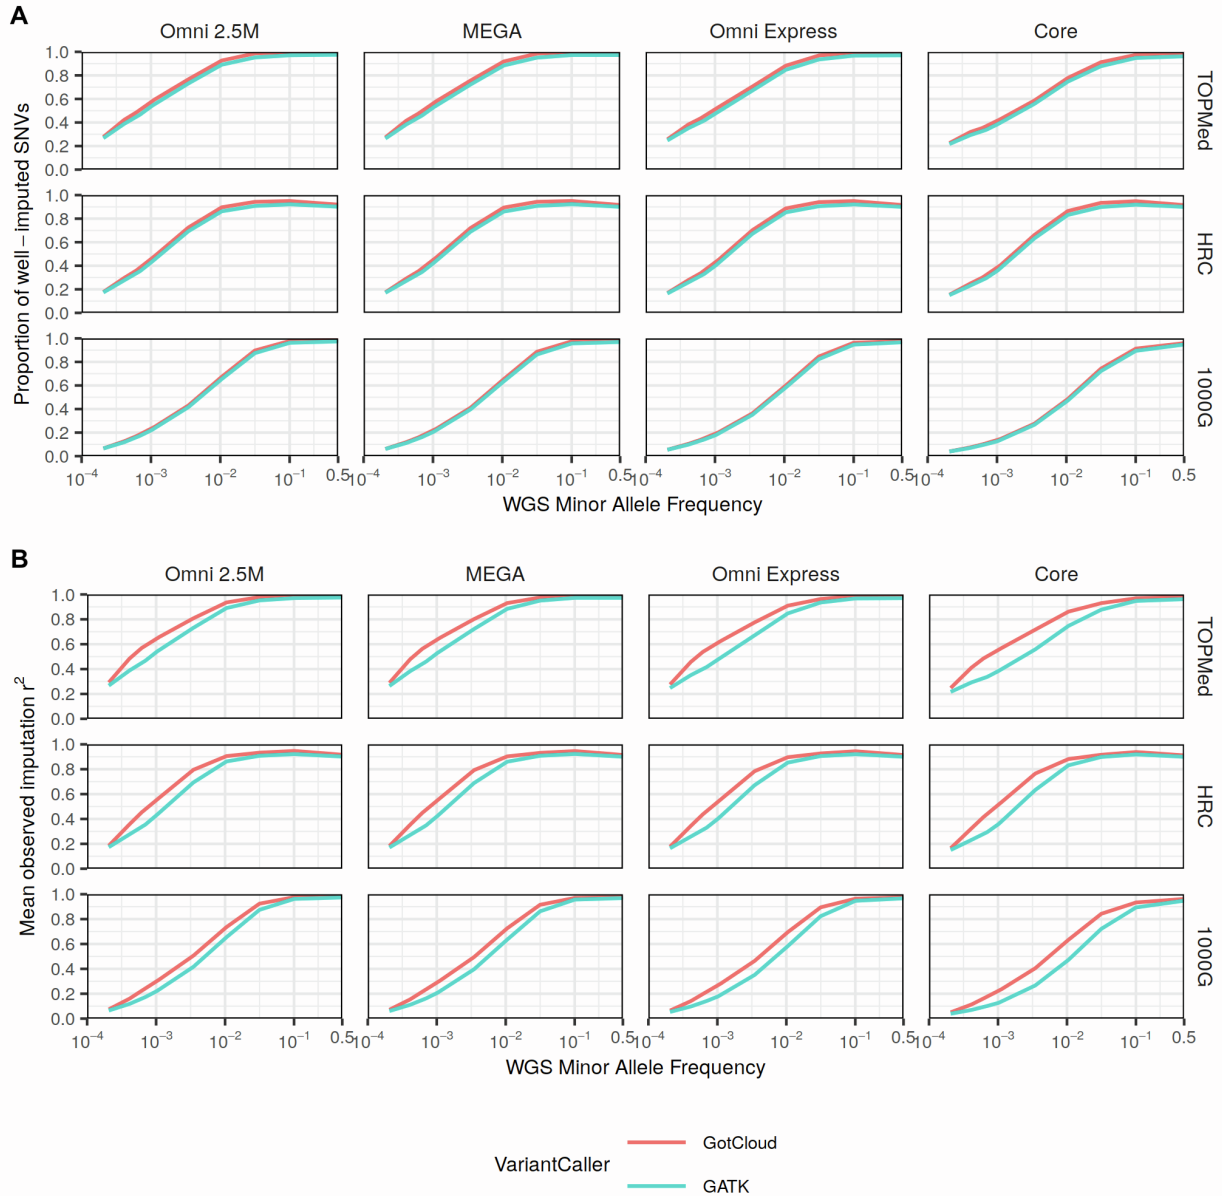

**Figure S4. Proportion of well-imputed ( $r^2 > 0.8$ ) biallelic SNVs by reference panel, genotyping array, and variant caller in Finnish study.** The proportion of sequenced biallelic SNVs called with the GotCloud pipeline (red line) or GATK pipeline (blue line) in the Finnish study that are well-imputed ( $r^2 > 0.8$ ) by reference panel (rows) and genotyping array (columns). In all plots, the x-axes show minor allele frequency (MAF) calculated separately by study. Variants were aggregated by MAF bins of size 0.00025 MAF for MAF between 0.0002 and 0.002 and of size 0.001 MAF for MAF  $> 0.002$ ; those plotted here correspond to singletons, doubletons, and tripletons in each study, as well as those with mean MAF closest to the values 0.001, 0.0032, 0.01, 0.316, 0.1, and 0.5.

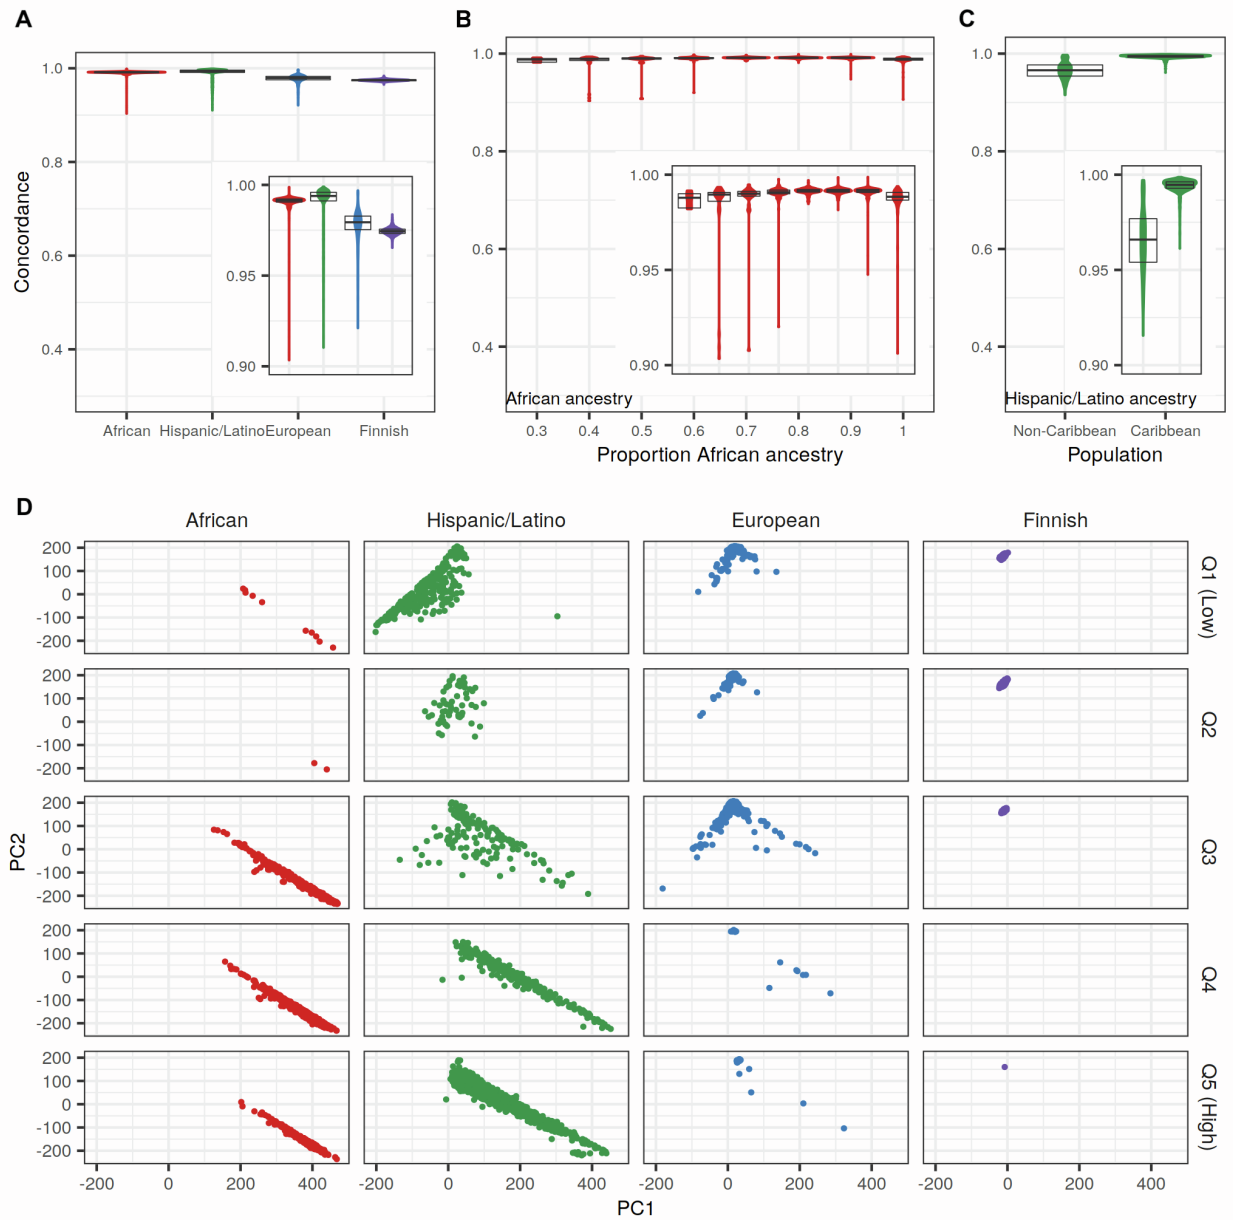

**Figure S5. Heterozygous genotype concordance rates for low-frequency variants by ancestry with TOPMed panel imputation.** Heterozygous concordance rates were calculated between sequenced and TOPMed imputed genotypes for low-frequency ( $0.5\% < \text{MAF} < 5\%$ , calculated separately in each study) biallelic SNVs with the Omni2.5M array. A. Distribution of concordance rates in each of the four studies. Boxplots correspond to 25th, 50th, and 75th percentiles. B. Distribution of concordance rates by bins of estimated proportion of African ancestry in the admixed African study. C. Distribution of concordance rates in Caribbean and non-Caribbean populations in the Hispanic/Latino study. The inset figures in panels A-C show the same distributions with a restricted y-axis. D. Principal component analysis (PCA) by genotype concordance quintile and ancestry. PCA was performed by projecting onto the Human Genome Diversity Project reference samples. Genotype concordance quintiles were calculated across all four studies and correspond to concordance rates of 0.903-0.964 (Q1), 0.964-0.971 (Q2), 0.971-0.973 (Q3), 0.973-0.974 (Q4), and 0.974-0.974 (Q5). Points are colored by ancestry.

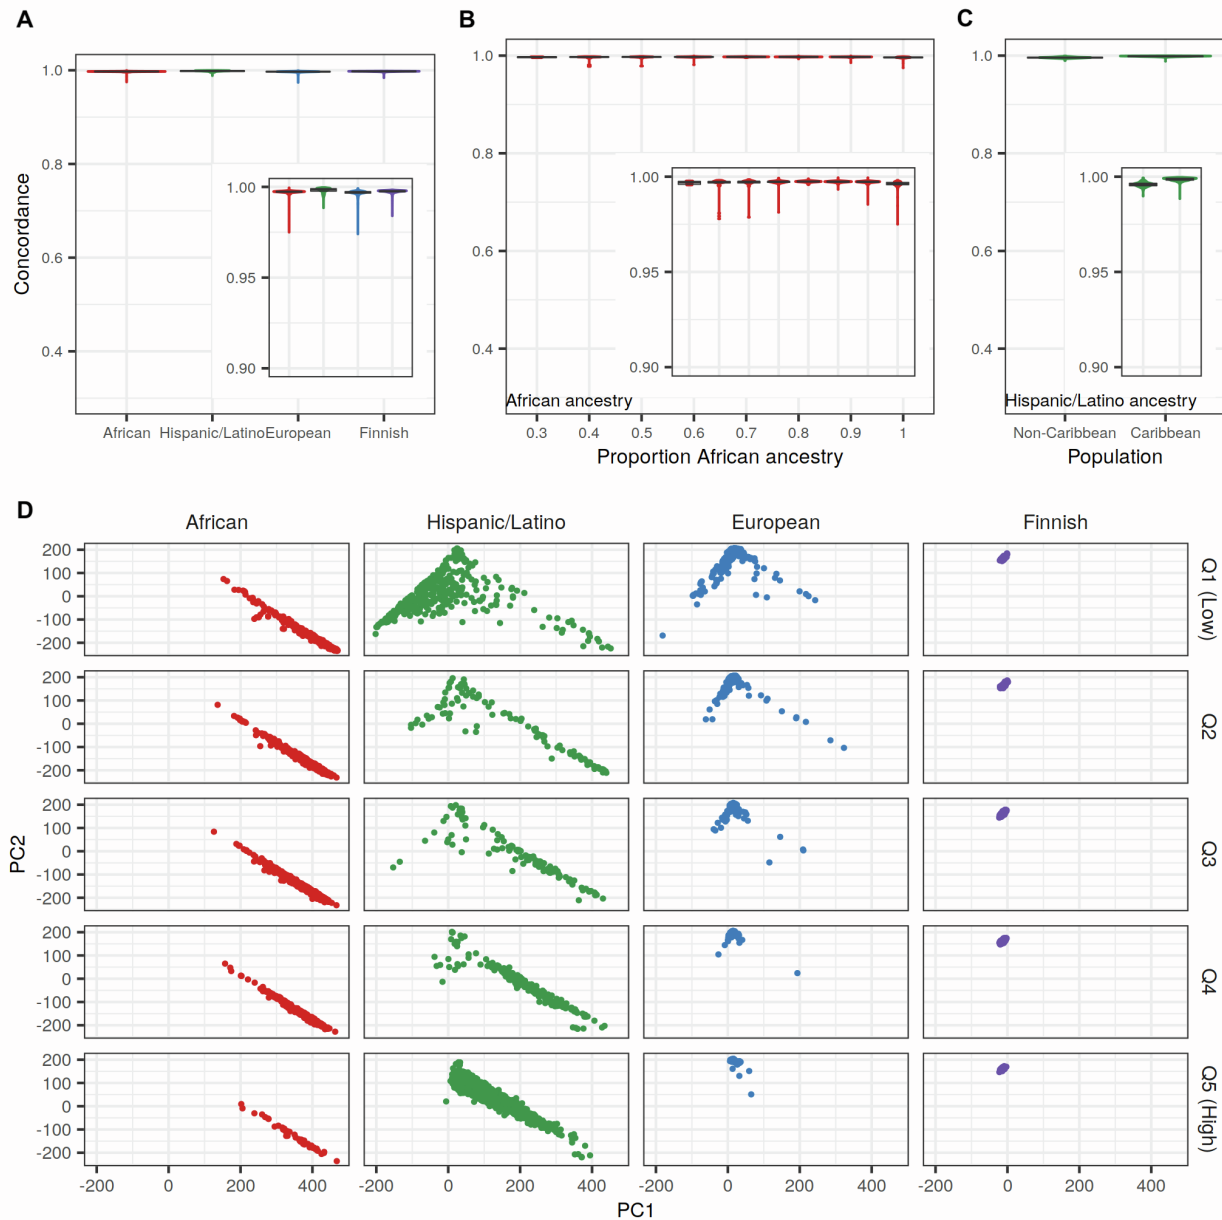

**Figure S6. Heterozygous genotype concordance rates for common variants by ancestry with TOPMed panel imputation.** Heterozygous concordance rates were calculated between sequenced and TOPMed imputed genotypes for common (MAF>5%, calculated separately in each study) biallelic SNVs with the Omni2.5M array. A. Distribution of concordance rates in each of the four studies. Boxplots correspond to 25th, 50th, and 75th percentiles. B. Distribution of concordance rates by bins of estimated proportion of African ancestry in the admixed African study. C. Distribution of concordance rates in Caribbean and non-Caribbean populations in the Hispanic/Latino study. The inset figures in panels A-C show the same distributions with a restricted y-axis. D. Principal component analysis (PCA) by genotype concordance quintile and ancestry. PCA was performed by projecting onto the Human Genome Diversity Project reference samples. Genotype concordance quintiles were calculated across all four studies and correspond to concordance rates of 0.974-0.995 (Q1), 0.995-0.996 (Q2), 0.996-0.996 (Q3), 0.996-0.997 (Q4), and 0.997-0.997 (Q5). Points are colored by ancestry.

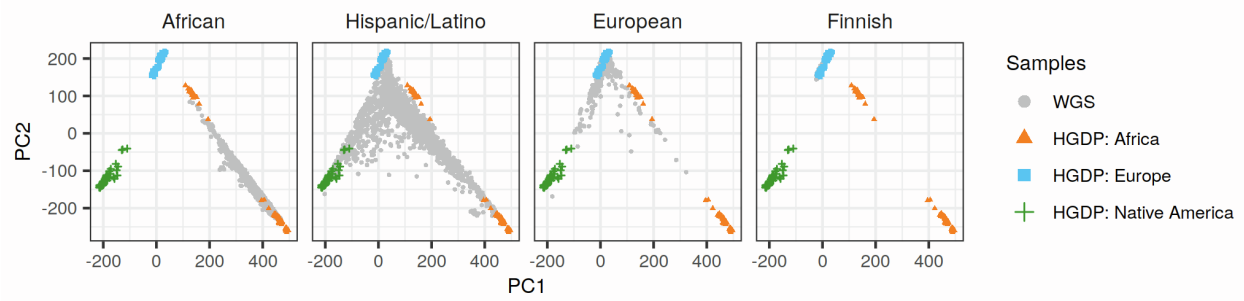

**Figure S7. Principal component analysis of WGS samples.** PC1 and PC2 for the four WGS studies and Human Genome Diversity Project (HGDP) reference samples from Africa (n=129), Europe (n=156), and Native America (n=63). PCA was performed by projecting onto all HGDP reference samples (n=938).



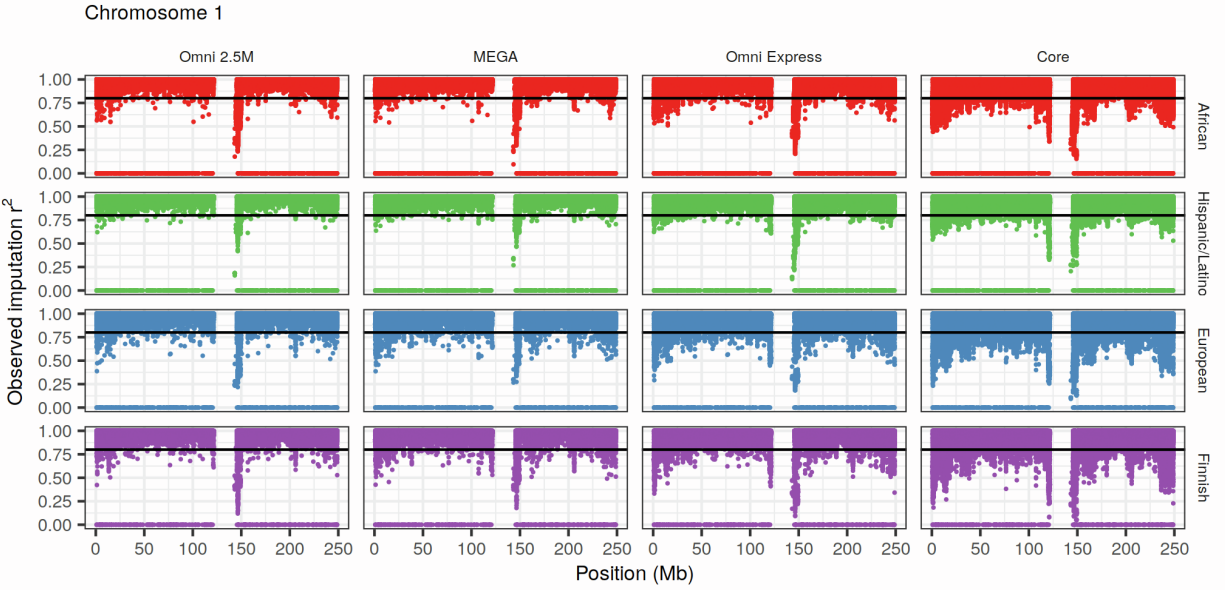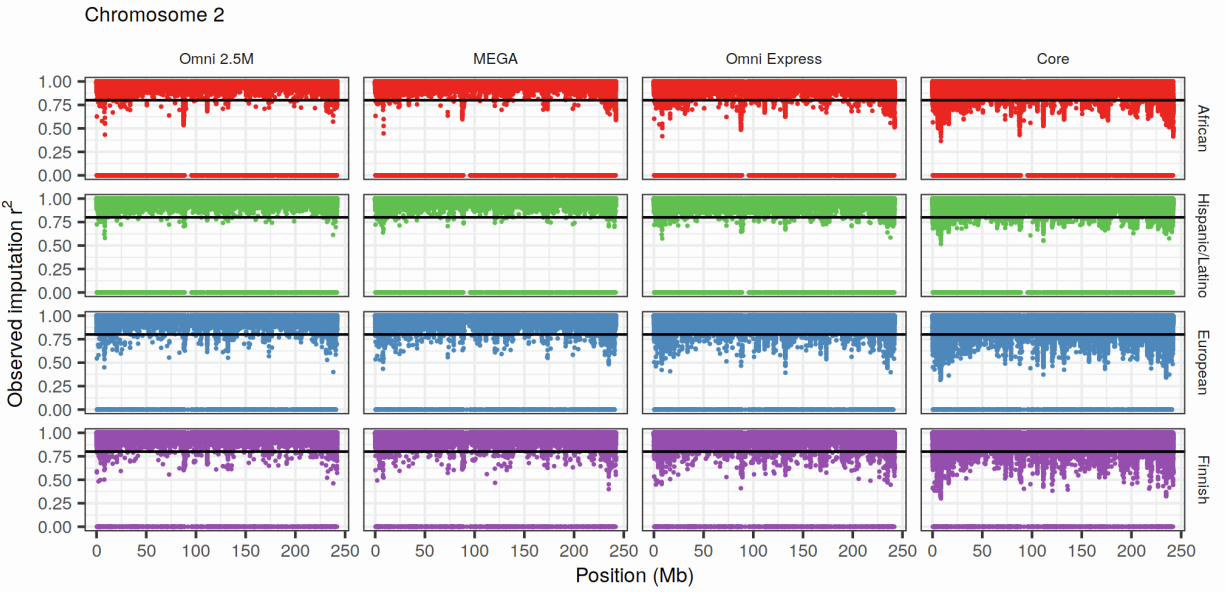

Chromosome 3

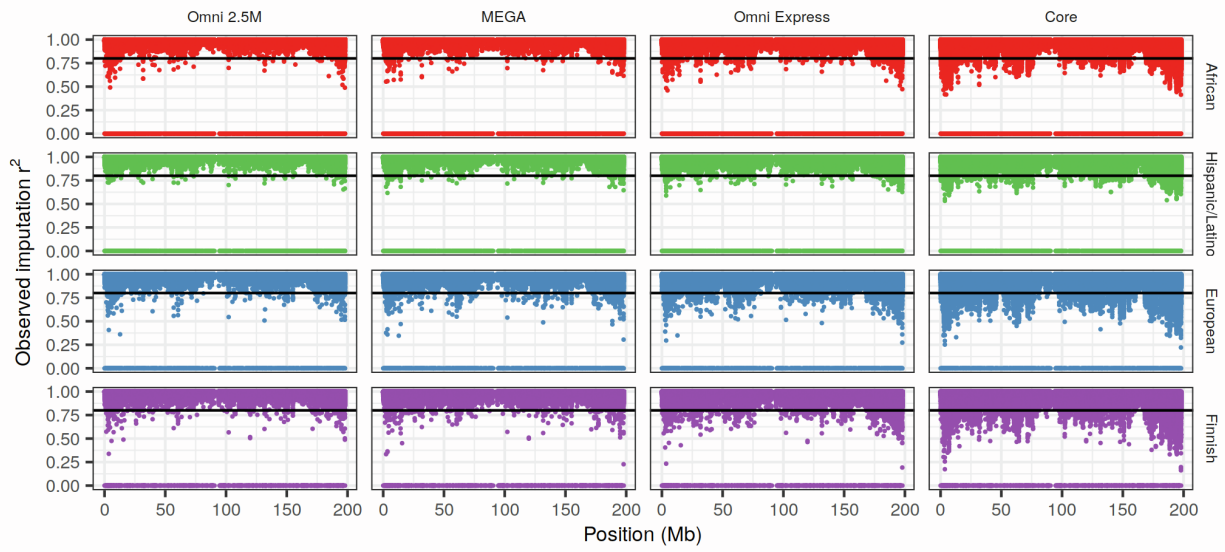

Chromosome 4

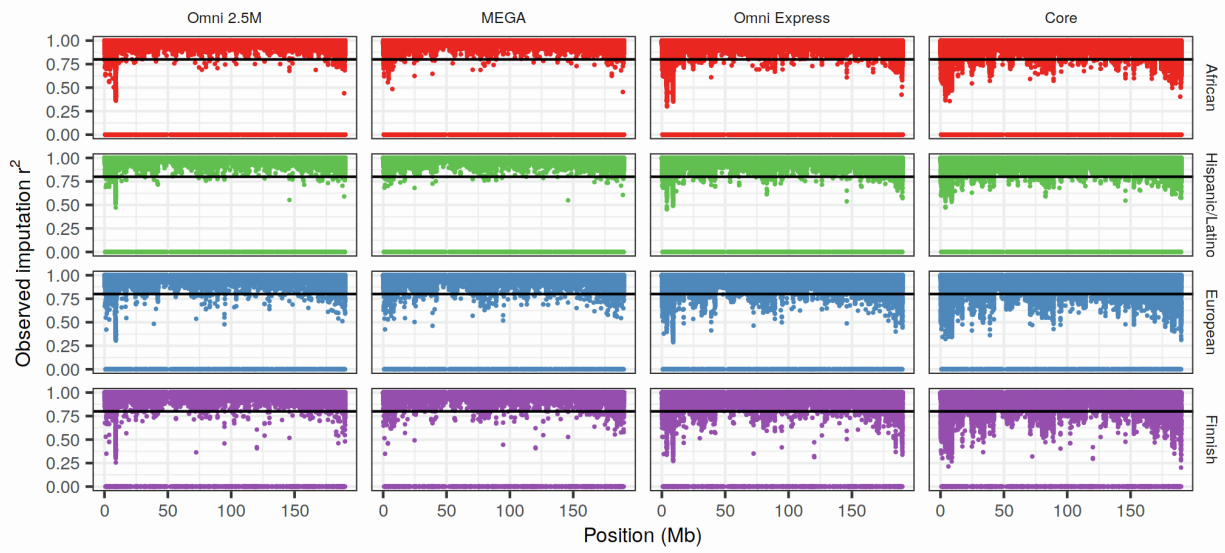

Chromosome 5

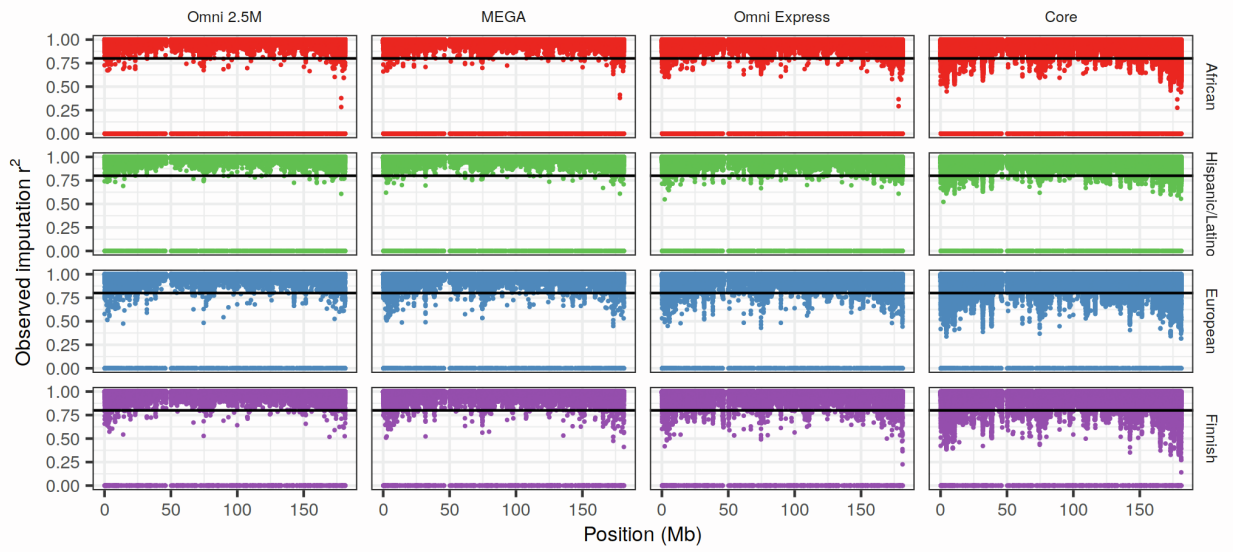

Chromosome 6

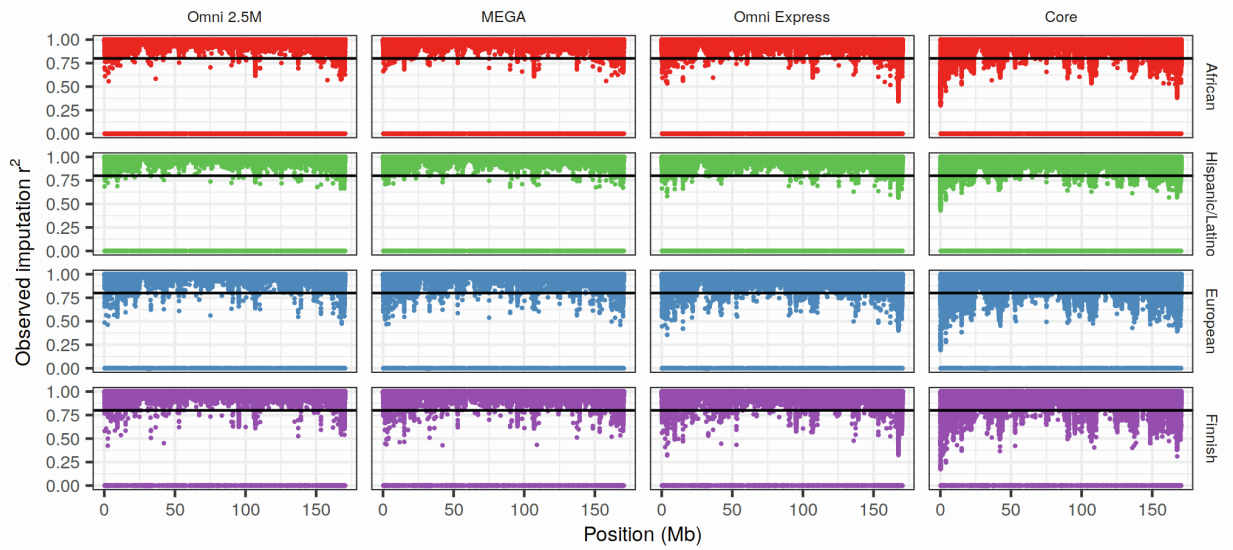

Chromosome 7

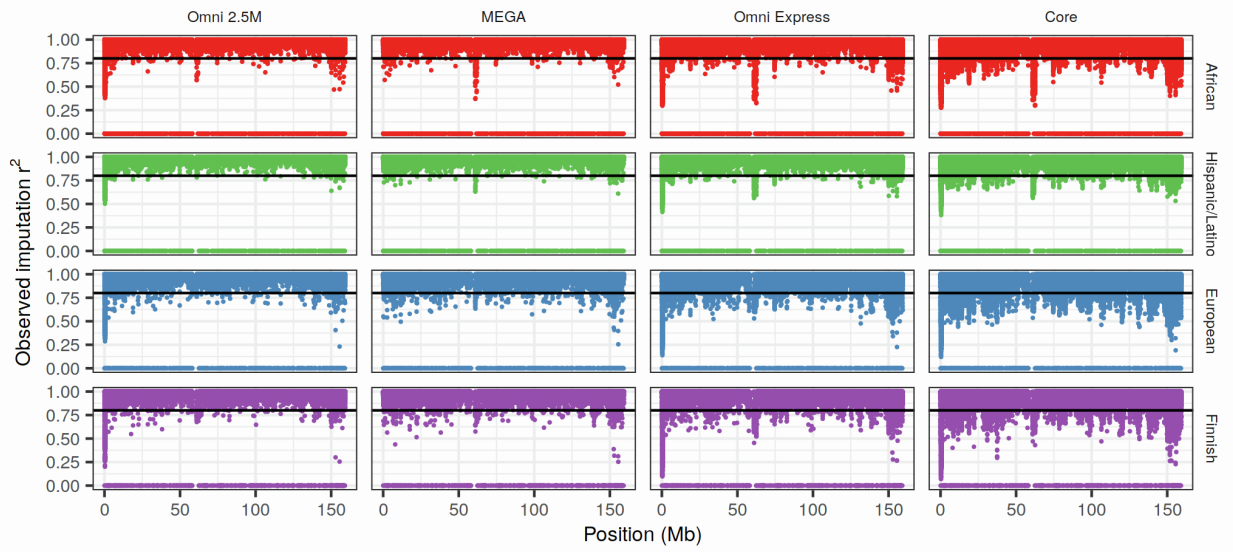

Chromosome 8

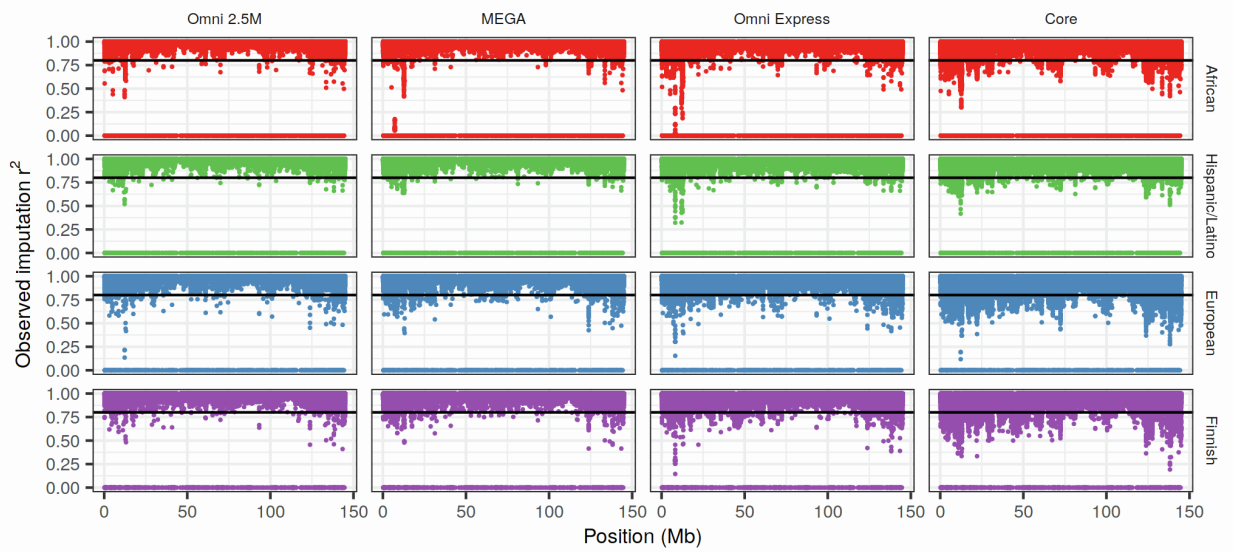

Chromosome 9

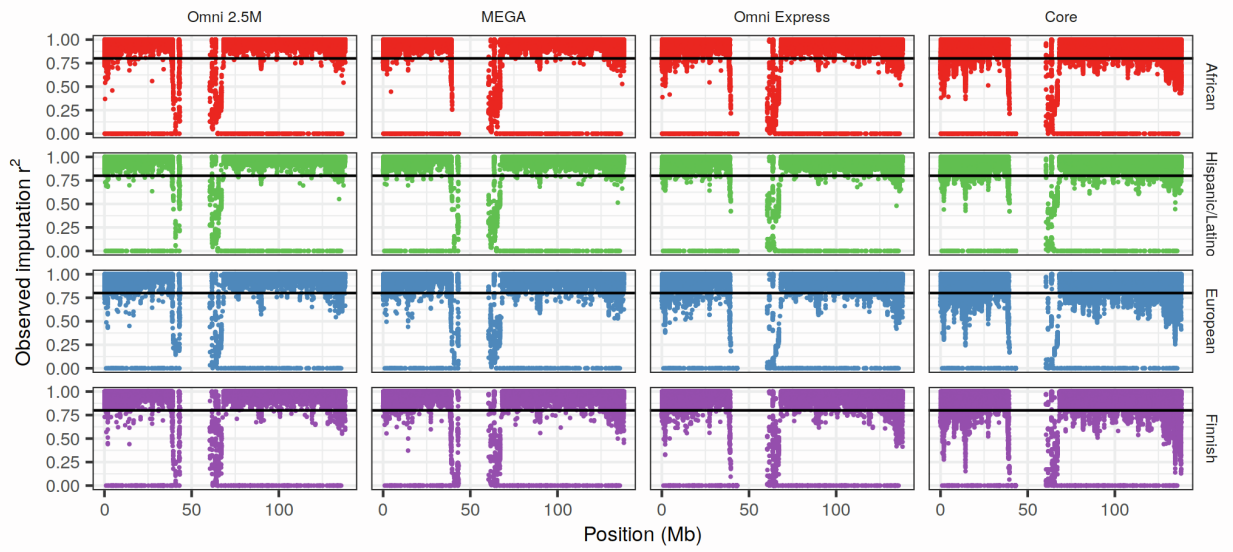

Chromosome 10

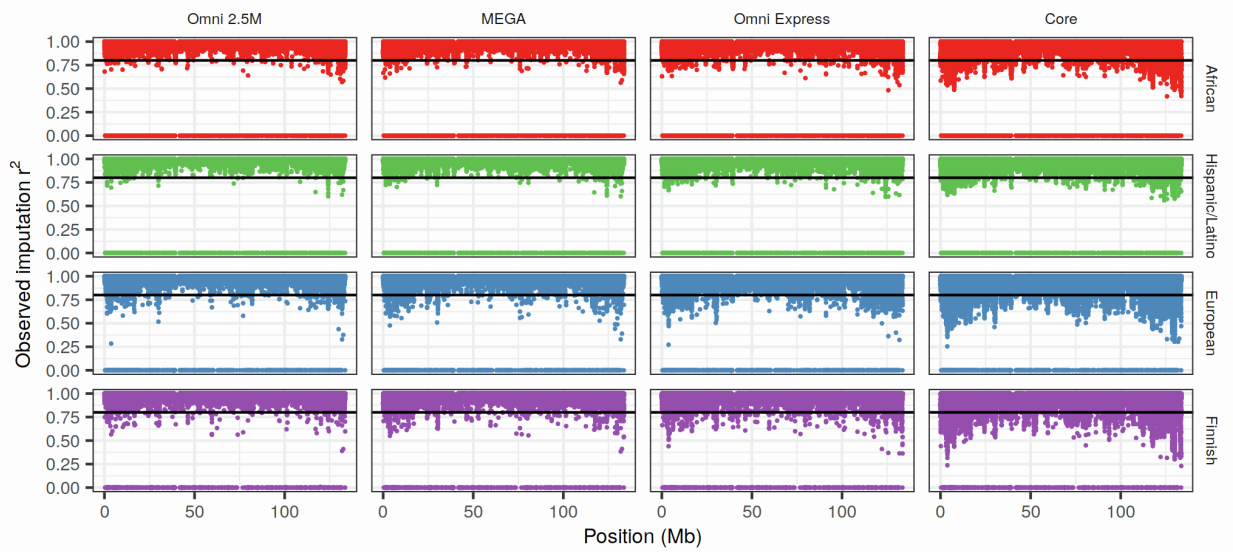

Chromosome 11

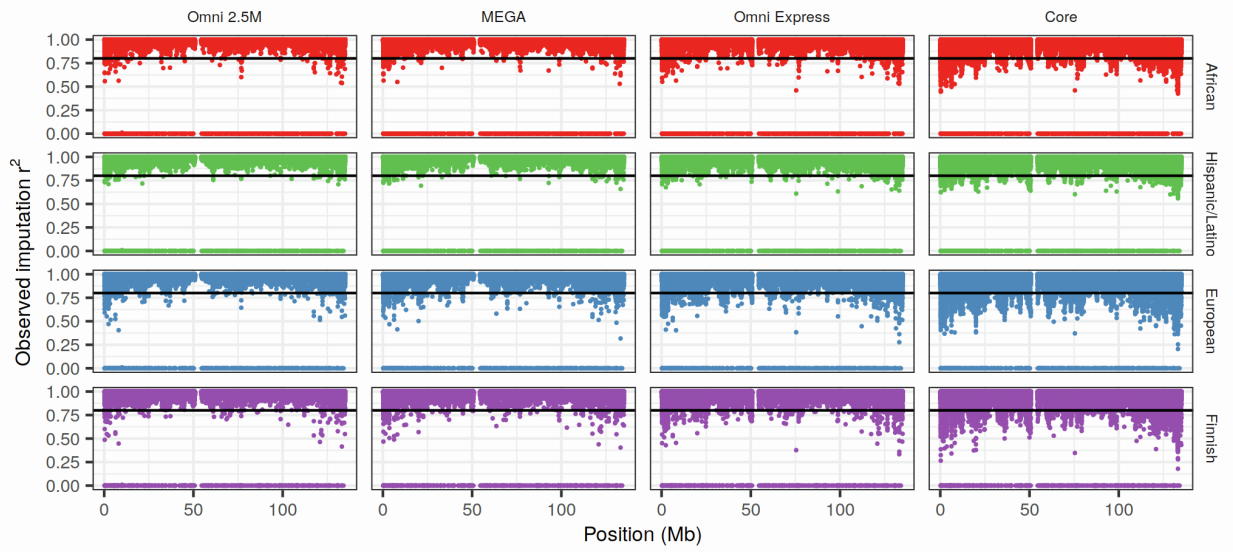

Chromosome 12

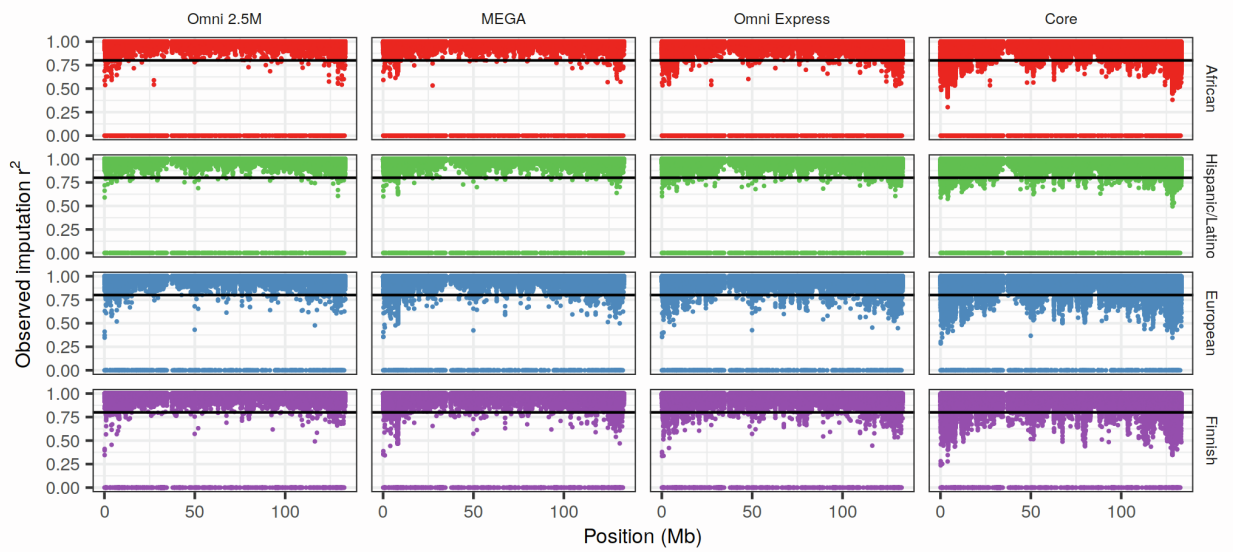

Chromosome 13

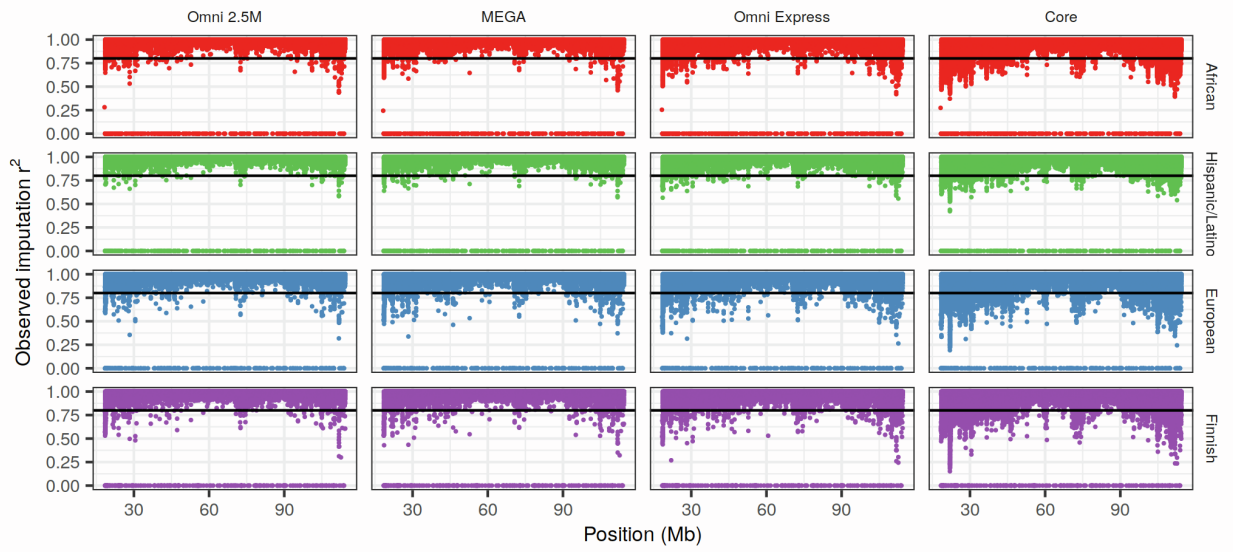

Chromosome 14

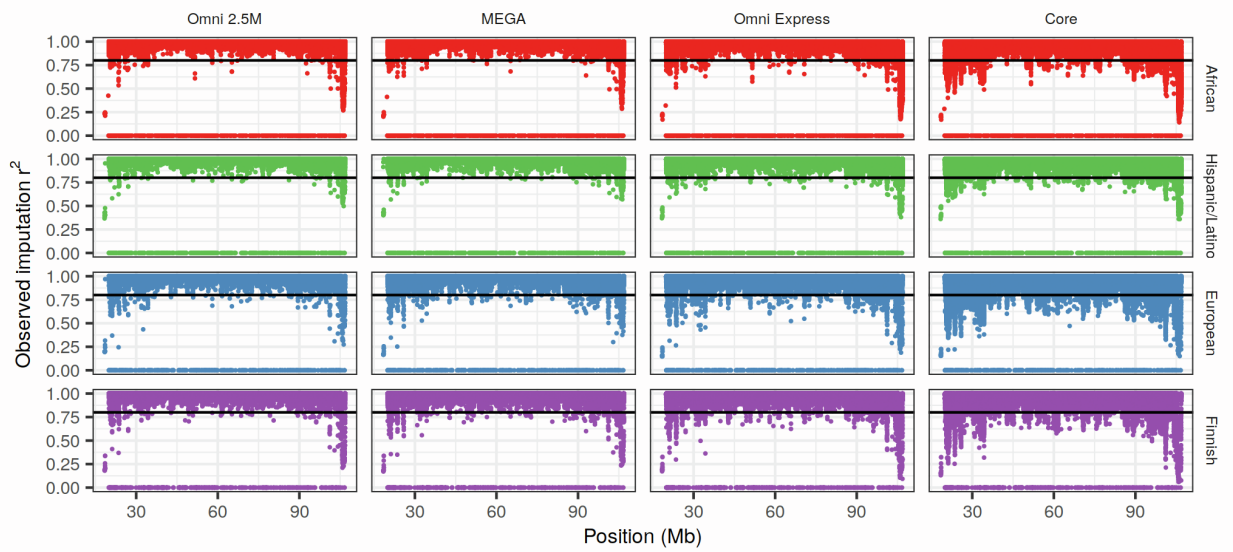

Chromosome 15

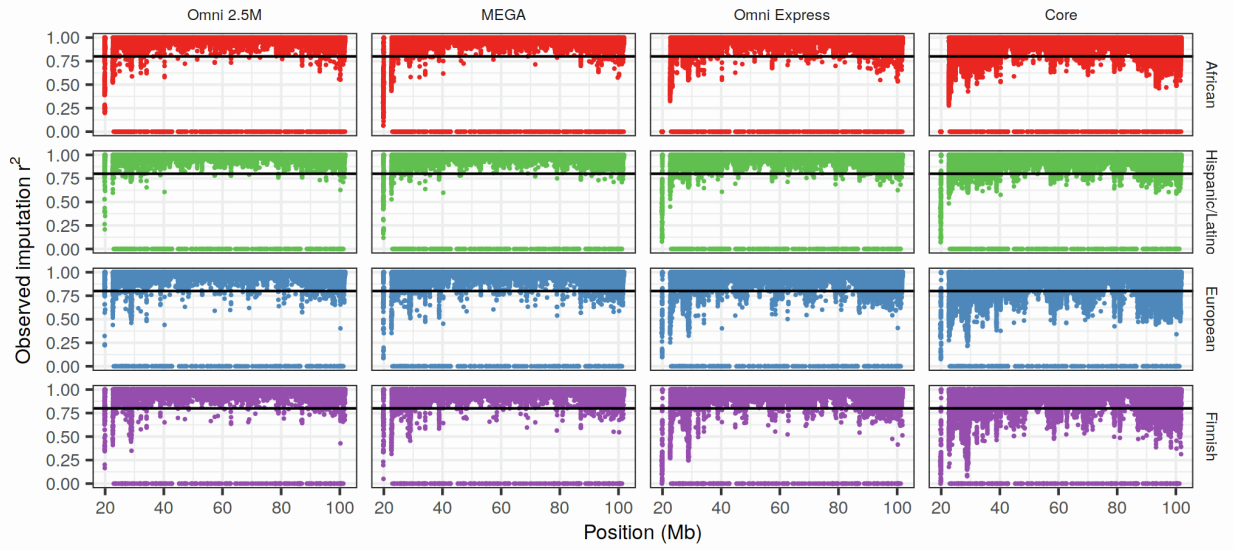

Chromosome 16

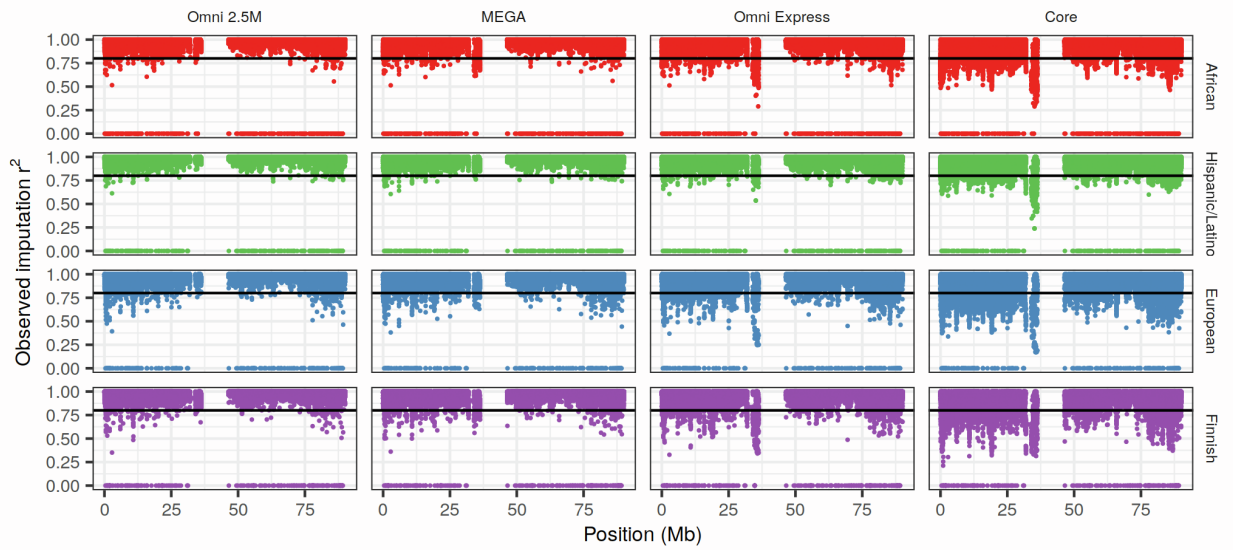



Chromosome 17

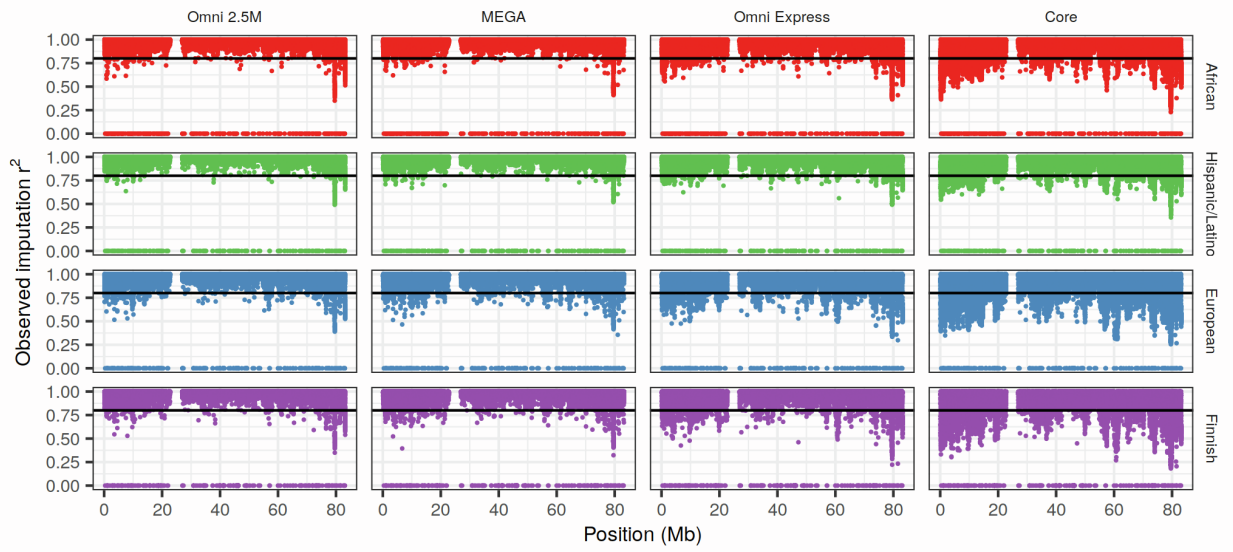

Chromosome 18

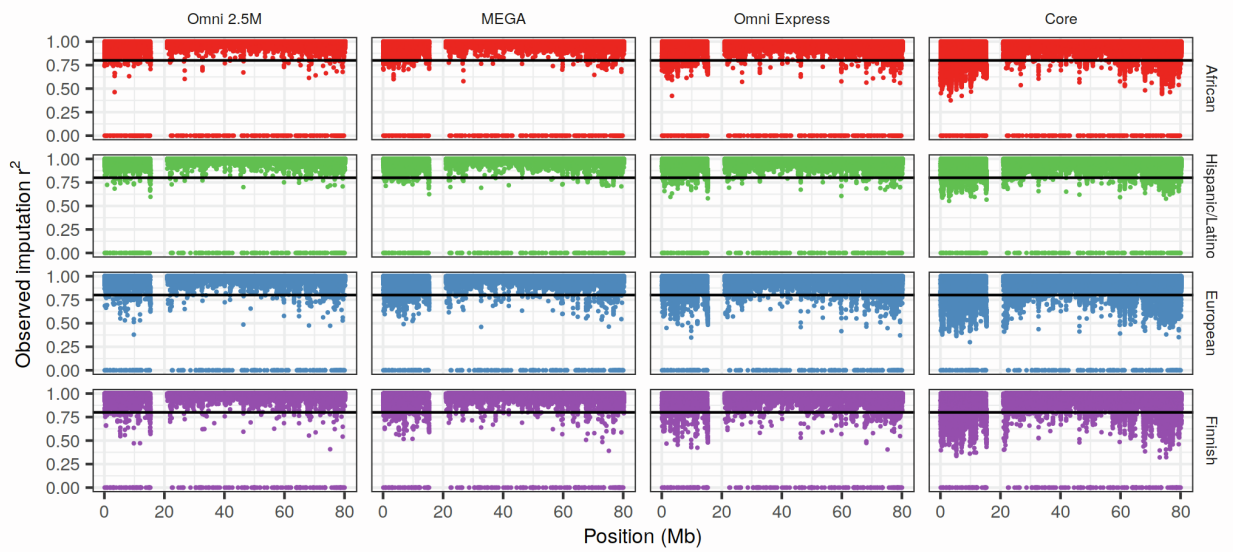

Chromosome 19

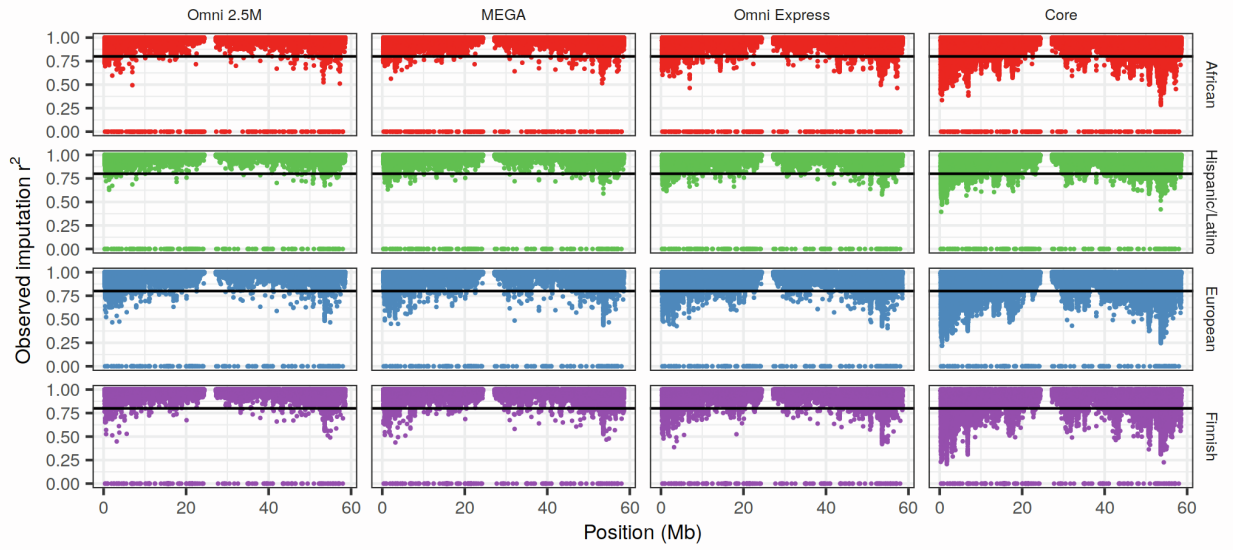

Chromosome 20

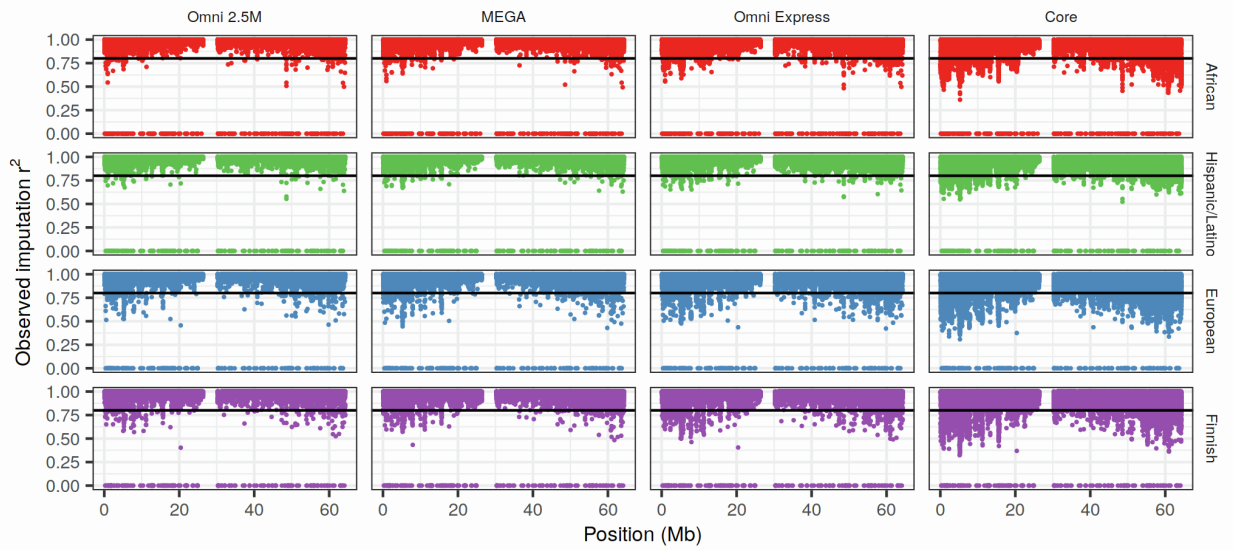

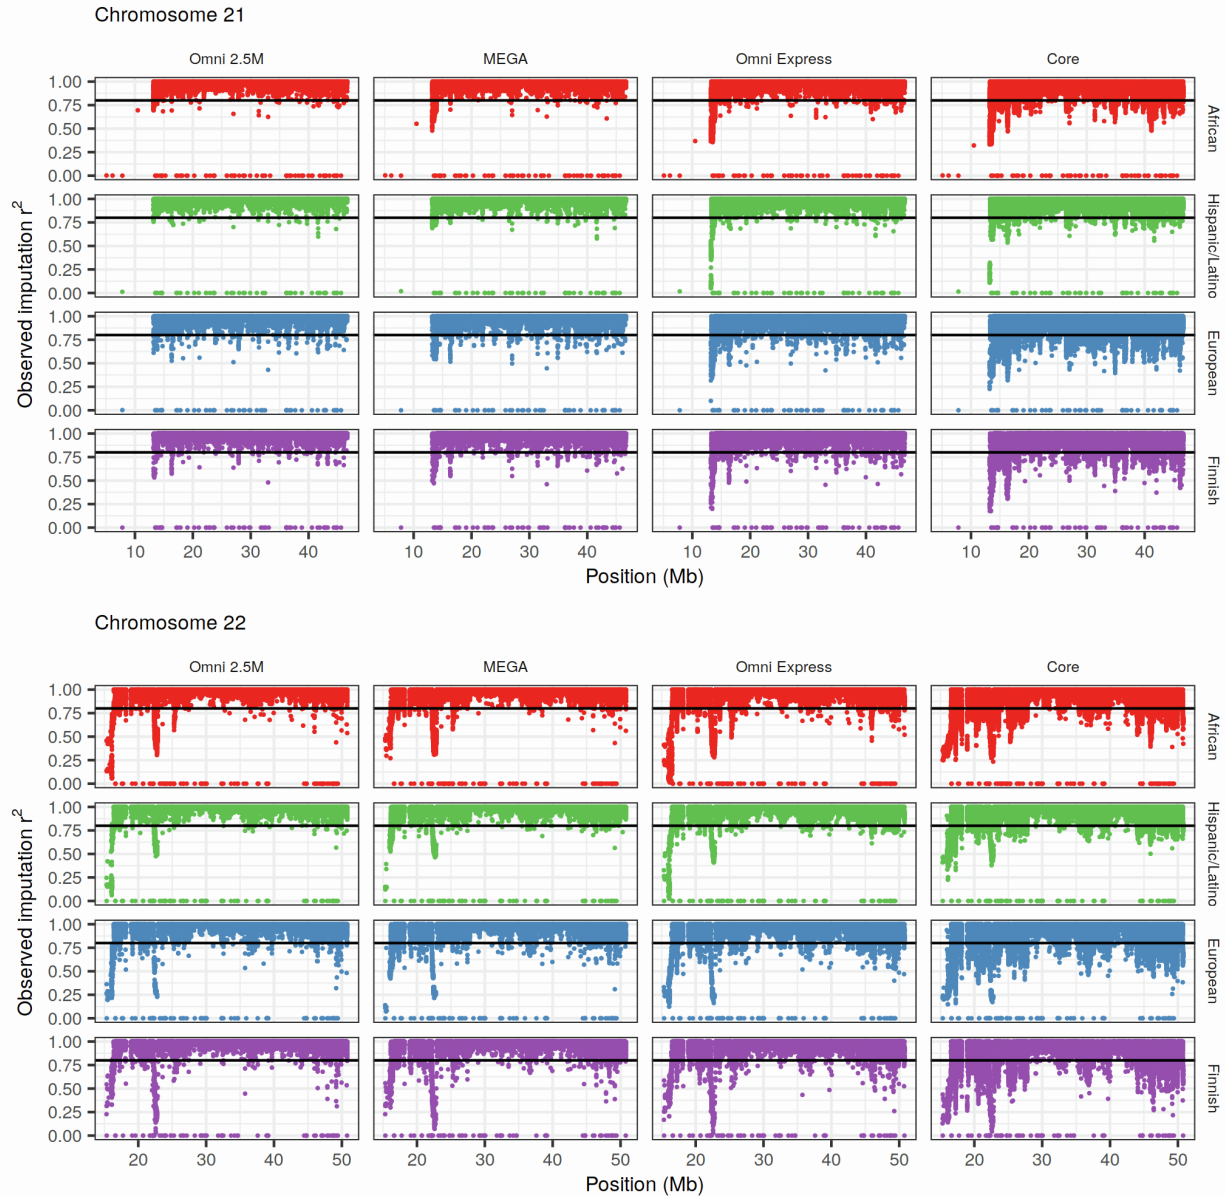

**Figure S8. Regional variability in imputation quality of common variants with the TOPMed reference panel by genotyping array and ancestry across all chromosomes.** Observed imputation  $r^2$  by genomic position (Mb) for common ( $MAF > 0.05$ ) biallelic SNVs across all chromosomes by genotyping array (columns) and ancestry (rows). Variants above the horizontal black lines are well-imputed (observed imputation  $r^2 > 0.08$ ).

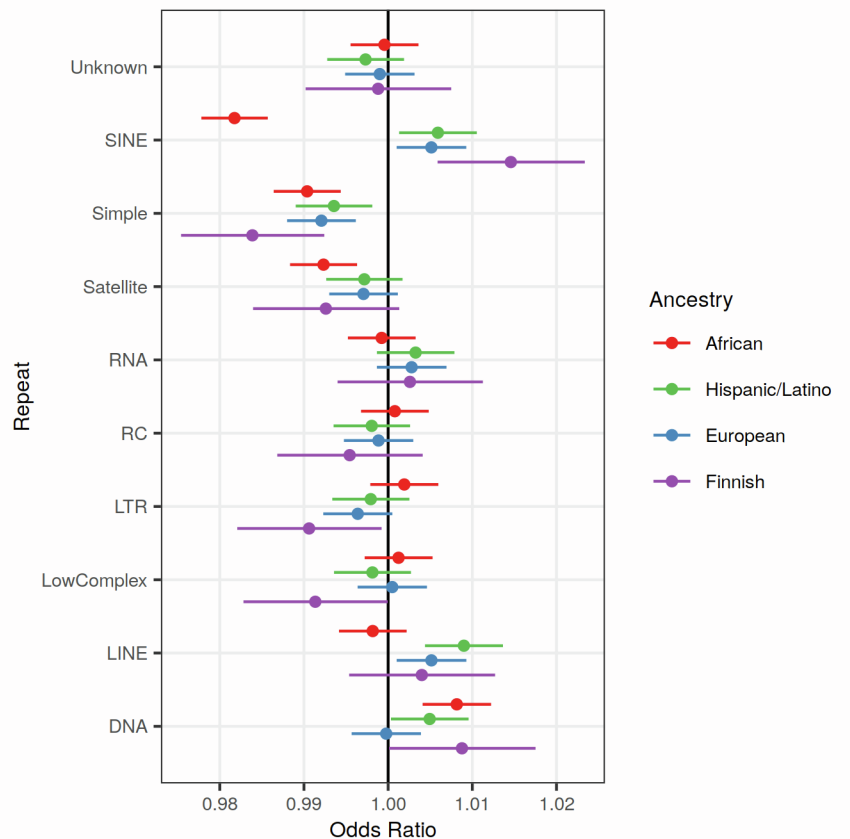

**Figure S9. Repeat classes associated with TOPMed imputation quality of biallelic SNVs by ancestry.** The odds ratios and corresponding 95% confidence intervals from logistic regression models. Estimates are from separate models testing the associations between each repeat class and whether or not a variant is well-imputed (observed imputation  $r^2 > 0.8$ ) adjusting for variant MAF. Repeat classes as defined by RepeatMasker include DNA repeat elements (DNA), long interspersed repeated elements (LINE), low complexity repeats (LowComplex), long terminal repeat elements including retrotransposons (LTR), rolling circle repeats (RC), RNA repeats (RNA), satellite repeats, microsatellites (Simple), short interspersed repeat elements including ALUs (SINE), and repeats of unknown class.

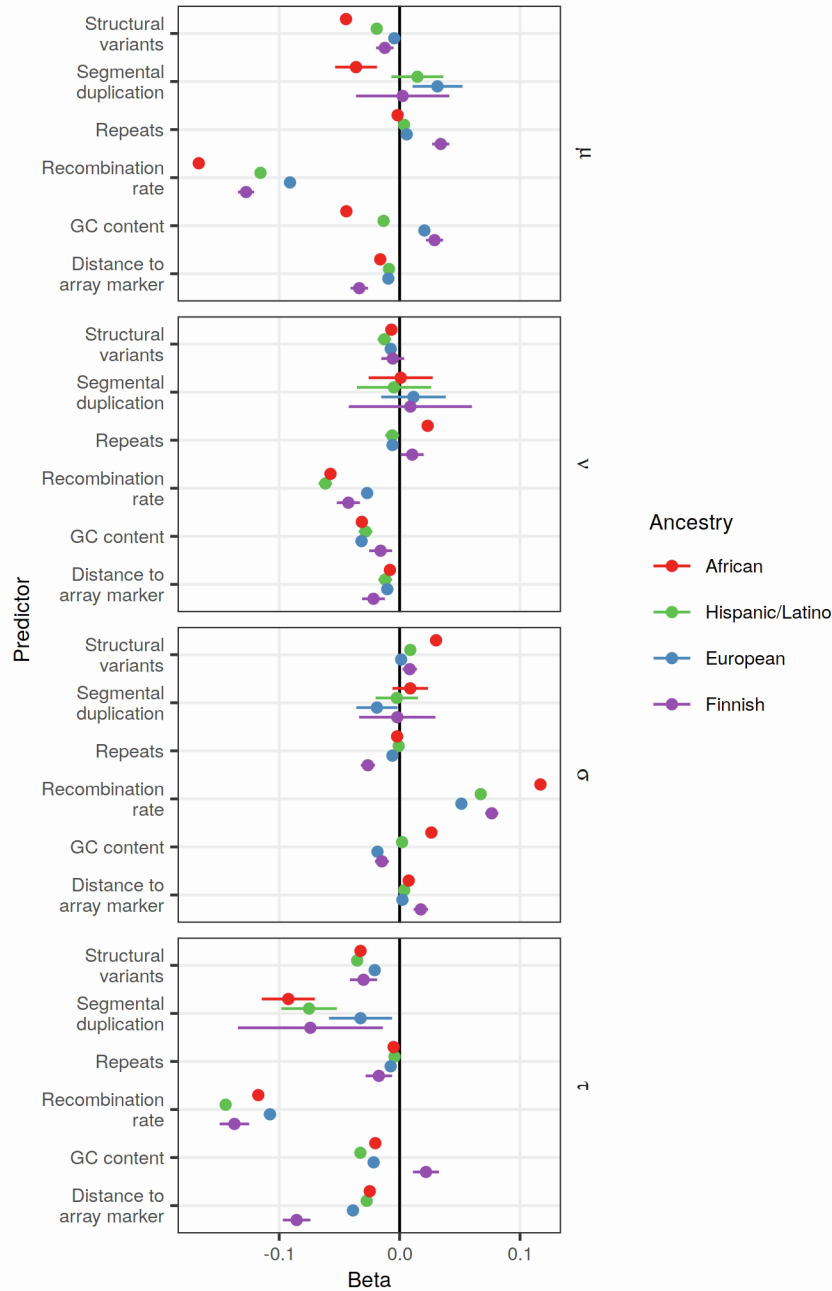

**Figure S10. Genomic features associated with TOPMed imputation quality of biallelic SNVs by ancestry.** The odds ratios and corresponding 95% confidence intervals from zero-one inflated beta regression models testing the association of genomic features with the observed imputation  $r^2$  in the open interval  $0 < r^2 < 1$  (mean  $\mu$  and variance-related parameter  $\sigma$ ) and the probabilities of observed imputation  $r^2=0$  ( $\nu$ ) or  $r^2=1$  ( $\tau$ ). Estimates are from separate models testing the associations between characteristics of regional genomic features and imputation quality (observed imputation  $r^2$ ) adjusting for variant MAF.

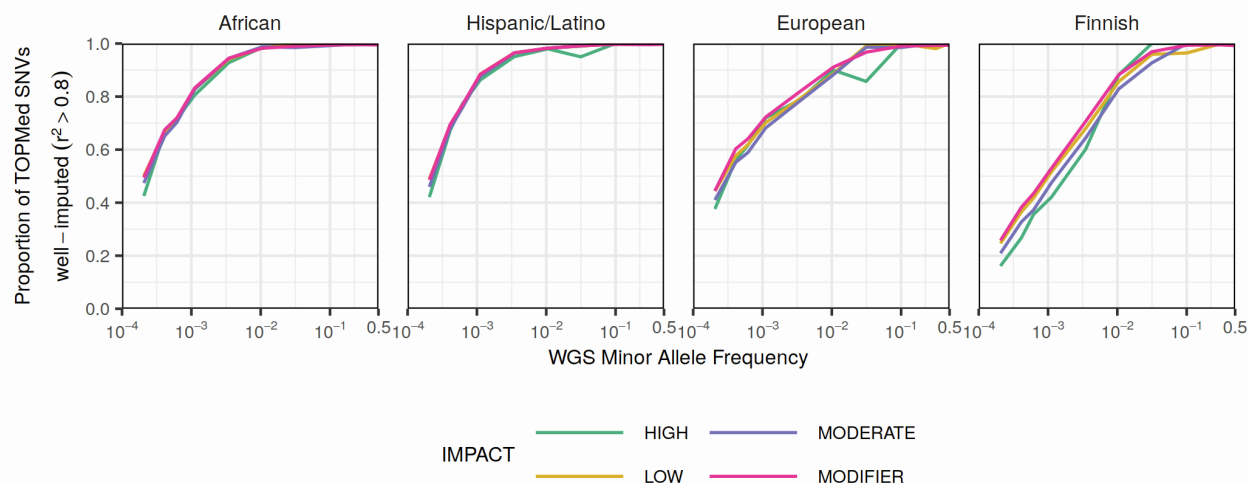

**Figure S11. Proportion of well-imputed ( $r^2 > 0.8$ ) biallelic SNVs by predicted functional impact and ancestry.** The predicted functional impact of all sequenced biallelic SNVs was determined with VEP. The x-axes show minor allele frequency (MAF) calculated separately by study. Biallelic SNVs were then aggregated by MAF bins of width 0.00025 MAF for MAF between 0.0002 and 0.002 and of size 0.001 MAF for MAF > 0.002; those plotted here correspond to singletons, doubletons, and tripletons in each study, as well as those with mean MAF closest to the values 0.001, 0.0032, 0.01, 0.032, 0.1, 0.32, and 0.5.

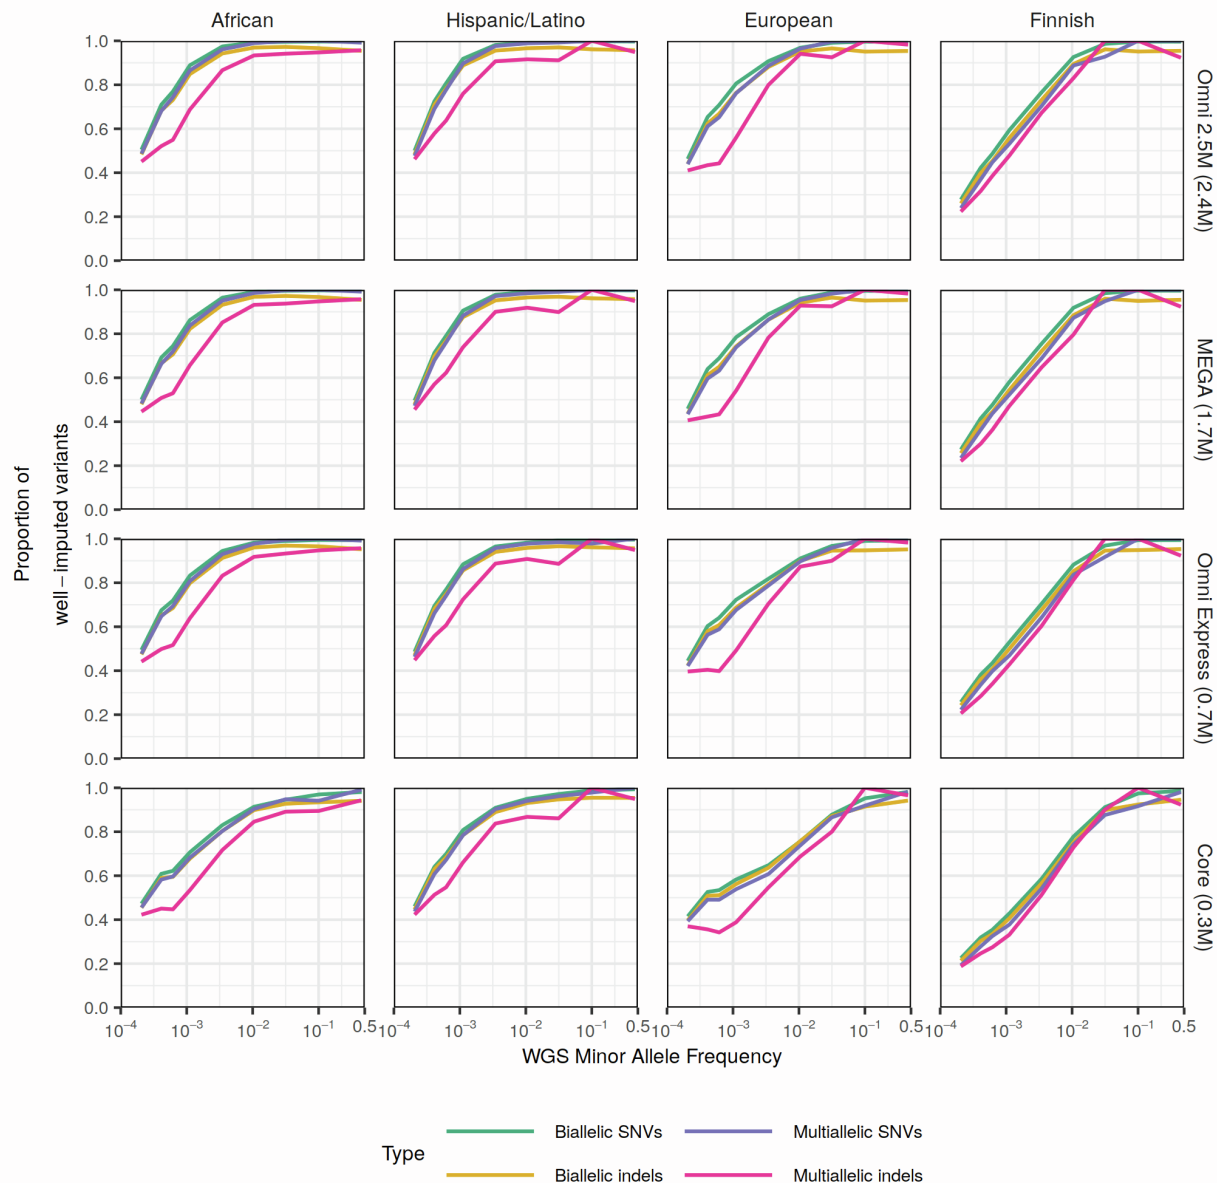

**Figure S12. Proportion of well-imputed ( $r^2 > 0.8$ ) variants by variant type, genotyping array, and ancestry with the TOPMed panel.** The proportion of sequenced variants that are well-imputed by genotyping array (rows) and ancestry (columns). X-axes show minor allele frequency (MAF) calculated separately in each study. Sequenced variants not present in reference panels were assigned  $r^2 = 0$ . Variants were then aggregated by MAF bins of width 0.00025 MAF for MAF between 0.0002 and 0.002, bins of width 0.001 MAF for MAF between 0.002 and 0.4, and one bin of width 0.1 MAF for MAF between 0.4 and 0.5. MAF bins plotted here correspond to singletons, doubletons, and tripletons in each study, as well as those with mean MAF closest to the values 0.01, 0.0032, 0.01, 0.316, 0.1, and 0.5.

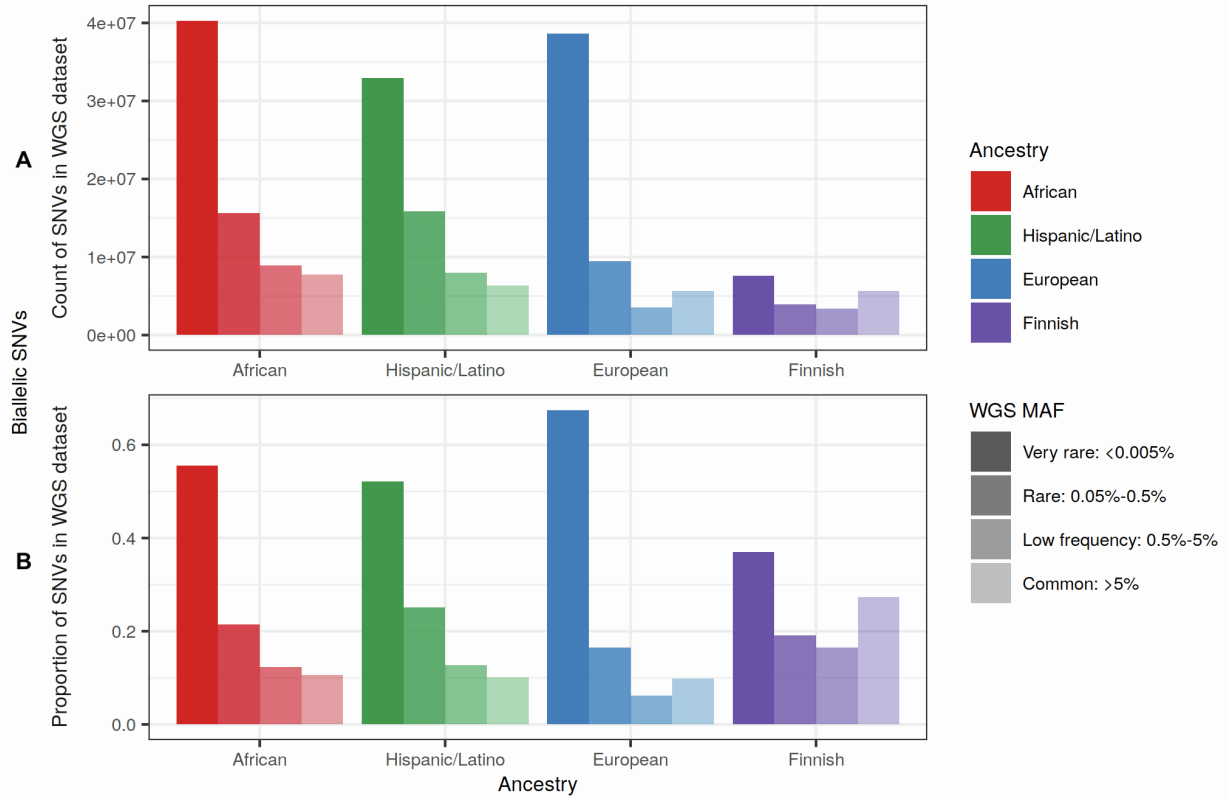

**Figure S13. Distribution of MAF for biallelic SNVs by ancestry.** A. Barplots of the number of biallelic SNVs in each MAF category for each WGS dataset. B. Barplots of the proportion of biallelic SNVs in each MAF category for each WGS dataset.



## Supplemental Tables

| Array       | Number of variants | African   | Hispanic/<br>Latino | European  | Finnish   |
|-------------|--------------------|-----------|---------------------|-----------|-----------|
| Omni 2.5M   | 2,381,000          | 2,132,501 | 2,330,998           | 2,330,998 | 2,264,709 |
| MEGA        | 1,780,000          | 1,415,237 | 1,759,171           | 1,759,171 | 1,676,050 |
| OmniExpress | 710,000            | 680,234   | 706,652             | 706,652   | 698,865   |
| Core        | 307,000            | 266,727   | 288,599             | 288,599   | 302,423   |

**Table S1. Whole genome sequencing (WGS)-based genotype arrays.** The numbers of variants included on the Illumina arrays and the actual number of WGS variants in each study used to create the WGS-based arrays.

| Reference panel | Array       | MAF           | African | Hispanic/Latino | European | Finnish |
|-----------------|-------------|---------------|---------|-----------------|----------|---------|
| TOPMed          | Omni 2.5M   | Common        | 7.7M    | 6.3M            | 5.6M     | 5.6M    |
|                 |             | Low frequency | 8.9M    | 8.0M            | 3.4M     | 3.2M    |
|                 |             | Rare          | 35.6M   | 32.4M           | 26.5M    | 4.8M    |
|                 | MEGA        | Common        | 7.7M    | 6.3M            | 5.6M     | 5.6M    |
|                 |             | Low frequency | 8.9M    | 8.0M            | 3.4M     | 3.2M    |
|                 |             | Rare          | 35.0M   | 32.0M           | 26.1M    | 4.7M    |
|                 | OmniExpress | Common        | 7.7M    | 6.3M            | 5.6M     | 5.6M    |
|                 |             | Low frequency | 8.8M    | 7.9M            | 3.3M     | 3.1M    |
|                 |             | Rare          | 34.2M   | 31.4M           | 24.9M    | 4.4M    |
|                 | Core        | Common        | 7.5M    | 6.3M            | 5.5M     | 5.5M    |
|                 |             | Low frequency | 8.2M    | 7.7M            | 2.8M     | 2.8M    |
|                 |             | Rare          | 31.2M   | 29.2M           | 22.2M    | 3.7M    |
| HRC             | Omni 2.5M   | Common        | 7.1M    | 5.9M            | 5.2M     | 5.2M    |
|                 |             | Low frequency | 6.0M    | 6.2M            | 2.9M     | 3.1M    |
|                 |             | Rare          | 4.0M    | 5.1M            | 9.4M     | 3.6M    |
|                 | MEGA        | Common        | 6.7M    | 5.8M            | 5.2M     | 5.2M    |
|                 |             | Low frequency | 4.9M    | 5.4M            | 2.8M     | 3.1M    |
|                 |             | Rare          | 3.6M    | 4.3M            | 8.6M     | 3.6M    |
|                 | OmniExpress | Common        | 6.5M    | 5.7M            | 5.2M     | 5.2M    |
|                 |             | Low frequency | 4.1M    | 4.7M            | 2.5M     | 3.1M    |
|                 |             | Rare          | 3.1M    | 3.7M            | 7.8M     | 3.4M    |
|                 | Core        | Common        | 4.7M    | 5.0M            | 4.9M     | 5.2M    |
|                 |             | Low frequency | 1.9M    | 2.7M            | 1.9M     | 3.0M    |
|                 |             | Rare          | 2.0M    | 2.3M            | 5.7M     | 3.1M    |
| 1000G           | Omni 2.5M   | Common        | 7.5M    | 6.2M            | 5.5M     | 5.5M    |
|                 |             | Low frequency | 7.2M    | 6.6M            | 2.4M     | 2.6M    |
|                 |             | Rare          | 4.4M    | 6.5M            | 7.0M     | 1.7M    |
|                 | MEGA        | Common        | 7.2M    | 6.1M            | 5.4M     | 5.5M    |
|                 |             | Low frequency | 6.1M    | 6.0M            | 2.3M     | 2.5M    |
|                 |             | Rare          | 3.5M    | 5.4M            | 6.3M     | 1.6M    |
|                 | OmniExpress | Common        | 6.9M    | 6.0M            | 5.3M     | 5.4M    |
|                 |             | Low frequency | 5.3M    | 5.4M            | 2.0M     | 2.4M    |
|                 |             | Rare          | 2.9M    | 4.8M            | 5.6M     | 1.4M    |
|                 | Core        | Common        | 5.4M    | 5.4M            | 5.0M     | 5.2M    |
|                 |             | Low frequency | 2.6M    | 3.3M            | 1.4M     | 2.0M    |
|                 |             | Rare          | 1.4M    | 2.9M            | 3.7M     | 1.1M    |

**Table S2. Number of well-imputed biallelic single nucleotide variants (SNVs) in each whole genome sequencing (WGS) study by reference panel, genotype array, ancestry, and minor allele frequency (MAF) category.**

| Reference panel | Array       | MAF           | African | Hispanic/Latino | European | Finnish |
|-----------------|-------------|---------------|---------|-----------------|----------|---------|
| TOPMed          | Omni 2.5M   | Common        | 0.997   | 0.997           | 0.996    | 0.996   |
|                 |             | Low frequency | 0.993   | 0.992           | 0.974    | 0.945   |
|                 |             | Rare          | 0.637   | 0.664           | 0.552    | 0.415   |
|                 | MEGA        | Common        | 0.997   | 0.997           | 0.996    | 0.996   |
|                 |             | Low frequency | 0.992   | 0.992           | 0.967    | 0.939   |
|                 |             | Rare          | 0.626   | 0.656           | 0.543    | 0.408   |
|                 | OmniExpress | Common        | 0.994   | 0.996           | 0.992    | 0.993   |
|                 |             | Low frequency | 0.984   | 0.985           | 0.927    | 0.913   |
|                 |             | Rare          | 0.613   | 0.642           | 0.517    | 0.379   |
|                 | Core        | Common        | 0.973   | 0.990           | 0.969    | 0.978   |
|                 |             | Low frequency | 0.922   | 0.954           | 0.800    | 0.830   |
|                 |             | Rare          | 0.559   | 0.598           | 0.461    | 0.318   |
| HRC             | Omni 2.5M   | Common        | 0.921   | 0.926           | 0.929    | 0.933   |
|                 |             | Low frequency | 0.668   | 0.772           | 0.812    | 0.908   |
|                 |             | Rare          | 0.071   | 0.104           | 0.195    | 0.314   |
|                 | MEGA        | Common        | 0.871   | 0.914           | 0.926    | 0.933   |
|                 |             | Low frequency | 0.546   | 0.679           | 0.784    | 0.907   |
|                 |             | Rare          | 0.065   | 0.088           | 0.180    | 0.310   |
|                 | OmniExpress | Common        | 0.834   | 0.894           | 0.917    | 0.932   |
|                 |             | Low frequency | 0.463   | 0.591           | 0.701    | 0.901   |
|                 |             | Rare          | 0.055   | 0.076           | 0.162    | 0.298   |
|                 | Core        | Common        | 0.609   | 0.792           | 0.875    | 0.931   |
|                 |             | Low frequency | 0.208   | 0.338           | 0.539    | 0.886   |
|                 |             | Rare          | 0.036   | 0.047           | 0.119    | 0.273   |
| 1000G           | Omni 2.5M   | Common        | 0.970   | 0.976           | 0.974    | 0.977   |
|                 |             | Low frequency | 0.801   | 0.828           | 0.692    | 0.760   |
|                 |             | Rare          | 0.079   | 0.134           | 0.145    | 0.150   |
|                 | MEGA        | Common        | 0.936   | 0.965           | 0.965    | 0.974   |
|                 |             | Low frequency | 0.679   | 0.752           | 0.658    | 0.745   |
|                 |             | Rare          | 0.063   | 0.110           | 0.131    | 0.142   |
|                 | OmniExpress | Common        | 0.895   | 0.946           | 0.948    | 0.966   |
|                 |             | Low frequency | 0.590   | 0.667           | 0.559    | 0.697   |
|                 |             | Rare          | 0.052   | 0.098           | 0.116    | 0.125   |
|                 | Core        | Common        | 0.691   | 0.851           | 0.880    | 0.930   |
|                 |             | Low frequency | 0.286   | 0.409           | 0.401    | 0.590   |
|                 |             | Rare          | 0.025   | 0.058           | 0.077    | 0.091   |

**Table S3. Proportion of biallelic single nucleotide variants (SNVs) in each whole genome sequencing (WGS) study that are well-imputed ( $r^2 > 0.8$ ) by reference panel, genotype array, ancestry, and minor allele frequency (MAF) category.**

| Reference panel | Array       | African | Hispanic/Latino | European | Finnish |
|-----------------|-------------|---------|-----------------|----------|---------|
| TOPMed          | Omni 2.5M   | 0.0014  | 0.0011          | 0.0035   | 0.0084  |
|                 | MEGA        | 0.0016  | 0.0011          | 0.0045   | 0.0095  |
|                 | OmniExpress | 0.0024  | 0.0014          | 0.0095   | 0.0126  |
|                 | Core        | 0.0084  | 0.0035          | 0.0395   | 0.0275  |
| HRC             | Omni 2.5M   | 0.0485  | 0.0364          | 0.0276   | 0.0115  |
|                 | MEGA        | 0.3065  | 0.0565          | 0.0346   | 0.0115  |
|                 | OmniExpress | NA      | 0.1055          | 0.0585   | 0.0135  |
|                 | Core        | NA      | NA              | 0.2015   | 0.0154  |
| 1000G           | Omni 2.5M   | 0.0245  | 0.0235          | 0.0385   | 0.0325  |
|                 | MEGA        | 0.0665  | 0.0364          | 0.0455   | 0.0365  |
|                 | OmniExpress | 0.1395  | 0.0675          | 0.0705   | 0.0515  |
|                 | Core        | NA      | 0.2225          | 0.1704   | 0.0945  |

**Table S4. Minor allele frequency (MAF) threshold above which array genotyping and imputation can approximate whole genome sequencing (WGS) for biallelic single nucleotide variants (SNVs) by reference panel, genotype array, and ancestry.** Threshold is the smallest MAF for which >90% of biallelic SNVs are well-imputed (observed imputation  $r^2 > 0.8$ ).

|        | Array        | MAF           | African |          |          |          | Hispanic/ Latino |      |      | European | Finnish |
|--------|--------------|---------------|---------|----------|----------|----------|------------------|------|------|----------|---------|
|        |              |               | All     | 0.25-0.5 | 0.5-0.75 | 0.75-1.0 | All              | NC   | C    | All      | All     |
| TOPMed | Omni 2.5M    | Common        | 1.00    | 1.00     | 1.00     | 1.00     | 1.00             | 1.00 | 1.00 | 1.00     | 1.00    |
|        |              | Low frequency | 0.99    | 0.98     | 0.99     | 0.99     | 0.99             | 0.99 | 0.97 | 0.98     | 0.97    |
|        |              | Rare          | 0.93    | 0.89     | 0.93     | 0.93     | 0.93             | 0.79 | 0.96 | 0.86     | 0.82    |
|        | MEGA         | Common        | 0.92    | 0.92     | 0.92     | 0.92     | 0.96             | 0.97 | 0.96 | 0.99     | 1.00    |
|        |              | Low frequency | 0.98    | 0.97     | 0.99     | 0.99     | 0.99             | 0.99 | 0.96 | 0.97     | 0.97    |
|        |              | Rare          | 0.91    | 0.87     | 0.91     | 0.91     | 0.92             | 0.78 | 0.95 | 0.84     | 0.81    |
|        | Omni Express | Common        | 0.92    | 0.92     | 0.92     | 0.92     | 0.96             | 0.97 | 0.96 | 0.99     | 1.00    |
|        |              | Low frequency | 0.98    | 0.97     | 0.99     | 0.99     | 0.99             | 0.99 | 0.96 | 0.97     | 0.97    |
|        |              | Rare          | 0.91    | 0.86     | 0.91     | 0.91     | 0.91             | 0.75 | 0.95 | 0.82     | 0.78    |
|        | Core         | Common        | 0.98    | 0.97     | 0.98     | 0.98     | 0.97             | 0.97 | 0.96 | 0.98     | 0.99    |
|        |              | Low frequency | 0.98    | 0.97     | 0.99     | 0.99     | 0.99             | 0.99 | 0.96 | 0.97     | 0.97    |
|        |              | Rare          | 0.86    | 0.80     | 0.86     | 0.86     | 0.88             | 0.68 | 0.92 | 0.76     | 0.71    |
| HRC    | Omni 2.5M    | Common        | 0.98    | 0.98     | 0.98     | 0.98     | 0.99             | 0.99 | 0.99 | 0.99     | 1.00    |
|        |              | Low frequency | 0.91    | 0.91     | 0.91     | 0.91     | 0.92             | 0.92 | 0.90 | 0.94     | 0.97    |
|        |              | Rare          | 0.70    | 0.73     | 0.72     | 0.69     | 0.70             | 0.67 | 0.71 | 0.70     | 0.82    |
|        | MEGA         | Common        | 0.96    | 0.97     | 0.96     | 0.96     | 0.98             | 0.98 | 0.98 | 0.99     | 1.00    |
|        |              | Low frequency | 0.81    | 0.82     | 0.82     | 0.81     | 0.89             | 0.89 | 0.88 | 0.93     | 0.97    |
|        |              | Rare          | 0.65    | 0.71     | 0.69     | 0.64     | 0.65             | 0.63 | 0.66 | 0.68     | 0.81    |
|        | Omni Express | Common        | 0.95    | 0.96     | 0.96     | 0.95     | 0.98             | 0.98 | 0.98 | 0.98     | 1.00    |
|        |              | Low frequency | 0.83    | 0.85     | 0.84     | 0.83     | 0.84             | 0.85 | 0.82 | 0.90     | 0.97    |
|        |              | Rare          | 0.62    | 0.67     | 0.66     | 0.61     | 0.60             | 0.57 | 0.61 | 0.65     | 0.80    |
|        | Core         | Common        | 0.89    | 0.92     | 0.90     | 0.89     | 0.95             | 0.95 | 0.95 | 0.97     | 0.99    |
|        |              | Low frequency | 0.68    | 0.73     | 0.70     | 0.67     | 0.73             | 0.73 | 0.70 | 0.84     | 0.95    |
|        |              | Rare          | 0.50    | 0.58     | 0.55     | 0.49     | 0.51             | 0.47 | 0.51 | 0.55     | 0.77    |
| 1000G  | Omni 2.5M    | Common        | 0.98    | 0.98     | 0.98     | 0.98     | 0.99             | 0.99 | 0.99 | 0.97     | 0.99    |
|        |              | Low frequency | 0.93    | 0.92     | 0.93     | 0.93     | 0.91             | 0.92 | 0.89 | 0.88     | 0.90    |
|        |              | Rare          | 0.73    | 0.69     | 0.71     | 0.73     | 0.73             | 0.66 | 0.75 | 0.62     | 0.71    |
|        | MEGA         | Common        | 0.97    | 0.97     | 0.97     | 0.97     | 0.98             | 0.98 | 0.98 | 0.97     | 0.99    |
|        |              | Low frequency | 0.88    | 0.87     | 0.88     | 0.88     | 0.89             | 0.90 | 0.87 | 0.86     | 0.91    |
|        |              | Rare          | 0.65    | 0.64     | 0.65     | 0.65     | 0.68             | 0.61 | 0.69 | 0.58     | 0.68    |
|        | Omni Express | Common        | 0.96    | 0.96     | 0.96     | 0.96     | 0.98             | 0.98 | 0.98 | 0.96     | 0.99    |
|        |              | Low frequency | 0.85    | 0.85     | 0.85     | 0.85     | 0.86             | 0.87 | 0.82 | 0.81     | 0.88    |
|        |              | Rare          | 0.61    | 0.58     | 0.61     | 0.62     | 0.64             | 0.56 | 0.66 | 0.54     | 0.63    |
|        | Core         | Common        | 0.90    | 0.92     | 0.91     | 0.90     | 0.95             | 0.95 | 0.95 | 0.94     | 0.97    |
|        |              | Low frequency | 0.70    | 0.72     | 0.71     | 0.70     | 0.74             | 0.75 | 0.69 | 0.69     | 0.78    |
|        |              | Rare          | 0.44    | 0.44     | 0.45     | 0.44     | 0.51             | 0.42 | 0.53 | 0.40     | 0.52    |

**Table S5. Mean heterozygous concordance rates by reference panel, genotype array, ancestry, and MAF category.** Summary statistics are further broken down for the African ancestry study by estimated proportion of African ancestry (0.25-0.5, 0.5-0.75, 0.75-1.00) and for the Hispanic/Latino ancestry study by Caribbean (C) and non-Caribbean (NC) origin.

|        | Array       | MAF           | Number of consecutively well-imputed ( $r^2>0.8$ ) biallelic SNVs |                  |                  |                  |                  |                  |                  |                  |                  |                  |                  |                  |
|--------|-------------|---------------|-------------------------------------------------------------------|------------------|------------------|------------------|------------------|------------------|------------------|------------------|------------------|------------------|------------------|------------------|
|        |             |               | African                                                           |                  |                  | Hispanic/ Latino |                  |                  | European         |                  |                  | Finnish          |                  |                  |
|        |             |               | 25 <sup>th</sup>                                                  | 50 <sup>th</sup> | 75 <sup>th</sup> | 25 <sup>th</sup> | 50 <sup>th</sup> | 75 <sup>th</sup> | 25 <sup>th</sup> | 50 <sup>th</sup> | 75 <sup>th</sup> | 25 <sup>th</sup> | 50 <sup>th</sup> | 75 <sup>th</sup> |
| TOPMed | Omni 2.5M   | Common        | 41                                                                | 277              | 750              | 52               | 295              | 777              | 33               | 197              | 576              | 35               | 210              | 592              |
|        |             | Low frequency | 9                                                                 | 85               | 287              | 18               | 66               | 186              | 4                | 12               | 41               | 4                | 11               | 25               |
|        |             | Rare          | 1                                                                 | 2                | 4                | 1                | 2                | 4                | 1                | 2                | 3                | 1                | 1                | 2                |
|        | MEGA        | Common        | 21                                                                | 243              | 715              | 41               | 276              | 753              | 16               | 139              | 473              | 17               | 157              | 505              |
|        |             | Low frequency | 5                                                                 | 45               | 205              | 14               | 57               | 166              | 3                | 9                | 30               | 4                | 10               | 23               |
|        |             | Rare          | 1                                                                 | 2                | 4                | 1                | 2                | 4                | 1                | 2                | 3                | 1                | 1                | 2                |
|        | Omni Expres | Common        | 4                                                                 | 106              | 512              | 17               | 193              | 616              | 7                | 56               | 267              | 8                | 72               | 328              |
|        |             | Low frequency | 3                                                                 | 15               | 98               | 7                | 30               | 92               | 2                | 6                | 16               | 3                | 7                | 16               |
|        |             | Rare          | 1                                                                 | 2                | 3                | 1                | 2                | 4                | 1                | 2                | 3                | 1                | 1                | 2                |
|        | Core        | Common        | 1                                                                 | 3                | 20               | 2                | 17               | 194              | 2                | 10               | 46               | 2                | 11               | 61               |
|        |             | Low frequency | 1                                                                 | 4                | 13               | 2                | 8                | 28               | 1                | 3                | 7                | 2                | 4                | 9                |
|        |             | Rare          | 1                                                                 | 2                | 3                | 1                | 2                | 3                | 1                | 1                | 2                | 1                | 1                | 2                |
| HRC    | Omni 2.5M   | Common        | 2                                                                 | 9                | 28               | 3                | 13               | 33               | 4                | 14               | 35               | 4                | 15               | 38               |
|        |             | Low frequency | 1                                                                 | 2                | 5                | 1                | 3                | 7                | 2                | 4                | 8                | 3                | 9                | 19               |
|        |             | Rare          | 1                                                                 | 1                | 1                | 1                | 1                | 1                | 1                | 1                | 1                | 1                | 1                | 2                |
|        | MEGA        | Common        | 2                                                                 | 4                | 15               | 3                | 10               | 28               | 4                | 14               | 33               | 4                | 15               | 38               |
|        |             | Low frequency | 1                                                                 | 2                | 3                | 1                | 2                | 5                | 1                | 3                | 7                | 3                | 8                | 18               |
|        |             | Rare          | 1                                                                 | 1                | 1                | 1                | 1                | 1                | 1                | 1                | 1                | 1                | 1                | 2                |
|        | Omni Expres | Common        | 1                                                                 | 4                | 12               | 2                | 8                | 22               | 3                | 12               | 29               | 4                | 15               | 38               |
|        |             | Low frequency | 1                                                                 | 2                | 3                | 1                | 2                | 4                | 1                | 2                | 5                | 3                | 8                | 17               |
|        |             | Rare          | 1                                                                 | 1                | 1                | 1                | 1                | 1                | 1                | 1                | 1                | 1                | 1                | 2                |
|        | Core        | Common        | 1                                                                 | 2                | 5                | 1                | 3                | 10               | 2                | 7                | 19               | 4                | 15               | 37               |
|        |             | Low frequency | 1                                                                 | 1                | 2                | 1                | 1                | 3                | 1                | 2                | 4                | 3                | 6                | 15               |
|        |             | Rare          | 1                                                                 | 1                | 1                | 1                | 1                | 1                | 1                | 1                | 1                | 1                | 1                | 2                |
| 1000G  | Omni 2.5M   | Common        | 3                                                                 | 15               | 68               | 5                | 27               | 85               | 6                | 25               | 72               | 7                | 30               | 88               |
|        |             | Low frequency | 2                                                                 | 4                | 8                | 2                | 4                | 9                | 1                | 2                | 5                | 1                | 3                | 6                |
|        |             | Rare          | 1                                                                 | 1                | 1                | 1                | 1                | 1                | 1                | 1                | 1                | 1                | 1                | 1                |
|        | MEGA        | Common        | 2                                                                 | 4                | 20               | 3                | 12               | 54               | 4                | 16               | 53               | 5                | 24               | 74               |
|        |             | Low frequency | 1                                                                 | 2                | 5                | 1                | 3                | 6                | 1                | 2                | 4                | 1                | 3                | 5                |
|        |             | Rare          | 1                                                                 | 1                | 1                | 1                | 1                | 1                | 1                | 1                | 1                | 1                | 1                | 1                |
|        | Omni Expres | Common        | 1                                                                 | 4                | 14               | 2                | 9                | 37               | 3                | 13               | 36               | 4                | 18               | 55               |
|        |             | Low frequency | 1                                                                 | 2                | 4                | 1                | 2                | 5                | 1                | 2                | 3                | 1                | 2                | 5                |
|        |             | Rare          | 1                                                                 | 1                | 1                | 1                | 1                | 1                | 1                | 1                | 1                | 1                | 1                | 1                |
|        | Core        | Common        | 1                                                                 | 2                | 5                | 1                | 3                | 11               | 2                | 5                | 17               | 2                | 8                | 27               |
|        |             | Low frequency | 1                                                                 | 1                | 2                | 1                | 2                | 3                | 1                | 1                | 3                | 1                | 2                | 4                |
|        |             | Rare          | 1                                                                 | 1                | 1                | 1                | 1                | 1                | 1                | 1                | 1                | 1                | 1                | 1                |

**Table S6. 25th, 50th, and 75th percentiles of the number of consecutive well-imputed (observed imputation  $r^2>0.8$ ) biallelic single nucleotide variants (SNVs) by reference panel, genotype array, ancestry, and minor allele frequency (MAF) category.**

|        | Array         | MAF           | Length in kb of consecutively well-imputed ( $r^2>0.8$ ) biallelic SNVs |                  |                  |                  |                  |                  |                  |                  |                  |                  |                  |                  |
|--------|---------------|---------------|-------------------------------------------------------------------------|------------------|------------------|------------------|------------------|------------------|------------------|------------------|------------------|------------------|------------------|------------------|
|        |               |               | African                                                                 |                  |                  | Hispanic/ Latino |                  |                  | European         |                  |                  | Finnish          |                  |                  |
|        |               |               | 25 <sup>th</sup>                                                        | 50 <sup>th</sup> | 75 <sup>th</sup> | 25 <sup>th</sup> | 50 <sup>th</sup> | 75 <sup>th</sup> | 25 <sup>th</sup> | 50 <sup>th</sup> | 75 <sup>th</sup> | 25 <sup>th</sup> | 50 <sup>th</sup> | 75 <sup>th</sup> |
| TOPMed | Omni 2.5M     | Common        | 10.4                                                                    | 84.8             | 253.2            | 15.7             | 109.6            | 315.3            | 11.6             | 80.1             | 256.5            | 12.5             | 87.2             | 267.4            |
|        |               | Low frequency | 2.3                                                                     | 23.9             | 84.3             | 5.2              | 20.7             | 60.1             | 1.6              | 7.8              | 29.8             | 2.3              | 8.0              | 19.2             |
|        |               | Rare          | 0.0                                                                     | 0.0              | 0.1              | 0.0              | 0.0              | 0.2              | 0.0              | 0.0              | 0.1              | 0.0              | 0.0              | 0.2              |
|        | MEGA          | Common        | 5.1                                                                     | 73.3             | 241.6            | 11.4             | 101.3            | 302.2            | 5.3              | 55.7             | 210.5            | 6.3              | 64.9             | 224.4            |
|        |               | Low frequency | 1.0                                                                     | 12.4             | 59.8             | 4.0              | 17.3             | 53.5             | 1.1              | 5.7              | 21.4             | 1.9              | 7.1              | 17.4             |
|        |               | Rare          | 0.0                                                                     | 0.0              | 0.1              | 0.0              | 0.0              | 0.2              | 0.0              | 0.0              | 0.1              | 0.0              | 0.0              | 0.2              |
|        | Omni Express  | Common        | 0.7                                                                     | 31.3             | 162.8            | 4.6              | 70.4             | 245.3            | 2.5              | 23.9             | 113.6            | 3.2              | 31.1             | 144.6            |
|        |               | Low frequency | 0.3                                                                     | 3.8              | 27.9             | 1.7              | 9.2              | 29.7             | 0.5              | 3.4              | 11.2             | 1.0              | 4.6              | 12.0             |
|        |               | Rare          | 0.0                                                                     | 0.0              | 0.1              | 0.0              | 0.0              | 0.1              | 0.0              | 0.0              | 0.1              | 0.0              | 0.0              | 0.2              |
| Core   | Common        | 0.0           | 0.6                                                                     | 5.9              | 0.3              | 6.2              | 73.1             | 0.3              | 4.1              | 21.2             | 0.4              | 5.0              | 28.1             |                  |
|        | Low frequency | 0.0           | 0.7                                                                     | 3.4              | 0.3              | 2.1              | 8.9              | 0.0              | 1.2              | 4.5              | 0.1              | 1.9              | 6.0              |                  |
|        | Rare          | 0.0           | 0.0                                                                     | 0.1              | 0.0              | 0.0              | 0.1              | 0.0              | 0.0              | 0.1              | 0.0              | 0.0              | 0.1              |                  |
| HRC    | Omni 2.5M     | Common        | 0.2                                                                     | 2.3              | 8.5              | 0.6              | 4.0              | 12.3             | 0.8              | 5.0              | 14.9             | 0.8              | 5.3              | 16.2             |
|        |               | Low frequency | 0.0                                                                     | 0.3              | 1.0              | 0.0              | 0.6              | 1.9              | 0.1              | 1.7              | 5.2              | 1.4              | 5.6              | 13.8             |
|        |               | Rare          | 0.0                                                                     | 0.0              | 0.0              | 0.0              | 0.0              | 0.0              | 0.0              | 0.0              | 0.0              | 0.0              | 0.0              | 0.1              |
|        | MEGA          | Common        | 0.0                                                                     | 0.9              | 4.3              | 0.3              | 2.9              | 10.1             | 0.7              | 4.7              | 14.2             | 0.8              | 5.3              | 16.2             |
|        |               | Low frequency | 0.0                                                                     | 0.1              | 0.7              | 0.0              | 0.3              | 1.2              | 0.0              | 1.4              | 4.4              | 1.3              | 5.5              | 13.5             |
|        |               | Rare          | 0.0                                                                     | 0.0              | 0.0              | 0.0              | 0.0              | 0.0              | 0.0              | 0.0              | 0.0              | 0.0              | 0.0              | 0.1              |
|        | Omni Express  | Common        | 0.0                                                                     | 0.7              | 3.4              | 0.2              | 2.2              | 8.2              | 0.7              | 4.2              | 12.4             | 0.8              | 5.3              | 16.1             |
|        |               | Low frequency | 0.0                                                                     | 0.0              | 0.5              | 0.0              | 0.2              | 1.0              | 0.0              | 0.8              | 2.9              | 1.1              | 5.1              | 12.7             |
|        |               | Rare          | 0.0                                                                     | 0.0              | 0.0              | 0.0              | 0.0              | 0.0              | 0.0              | 0.0              | 0.0              | 0.0              | 0.0              | 0.1              |
| Core   | Common        | 0.0           | 0.2                                                                     | 1.1              | 0.0              | 0.8              | 3.6              | 0.3              | 2.4              | 8.1              | 0.8              | 5.2              | 15.9             |                  |
|        | Low frequency | 0.0           | 0.0                                                                     | 0.2              | 0.0              | 0.0              | 0.5              | 0.0              | 0.3              | 1.7              | 0.8              | 4.0              | 10.6             |                  |
|        | Rare          | 0.0           | 0.0                                                                     | 0.0              | 0.0              | 0.0              | 0.0              | 0.0              | 0.0              | 0.0              | 0.0              | 0.0              | 0.0              |                  |
| 1000G  | Omni 2.5M     | Common        | 0.3                                                                     | 4.0              | 21.2             | 1.2              | 9.7              | 33.4             | 1.9              | 10.6             | 31.6             | 2.1              | 12.9             | 40.0             |
|        |               | Low frequency | 0.0                                                                     | 0.6              | 2.0              | 0.1              | 0.9              | 2.6              | 0.0              | 0.7              | 2.5              | 0.0              | 1.2              | 3.7              |
|        |               | Rare          | 0.0                                                                     | 0.0              | 0.0              | 0.0              | 0.0              | 0.0              | 0.0              | 0.0              | 0.0              | 0.0              | 0.0              | 0.0              |
|        | MEGA          | Common        | 0.0                                                                     | 1.0              | 6.0              | 0.4              | 4.2              | 20.4             | 0.9              | 6.7              | 23.2             | 1.5              | 9.9              | 33.1             |
|        |               | Low frequency | 0.0                                                                     | 0.3              | 1.1              | 0.0              | 0.5              | 1.7              | 0.0              | 0.5              | 2.2              | 0.0              | 1.1              | 3.4              |
|        |               | Rare          | 0.0                                                                     | 0.0              | 0.0              | 0.0              | 0.0              | 0.0              | 0.0              | 0.0              | 0.0              | 0.0              | 0.0              | 0.0              |
|        | Omni Express  | Common        | 0.0                                                                     | 0.7              | 4.0              | 0.3              | 3.0              | 14.3             | 0.9              | 5.4              | 16.5             | 1.3              | 8.1              | 25.0             |
|        |               | Low frequency | 0.0                                                                     | 0.2              | 0.9              | 0.0              | 0.3              | 1.3              | 0.0              | 0.2              | 1.5              | 0.0              | 0.8              | 2.7              |
|        |               | Rare          | 0.0                                                                     | 0.0              | 0.0              | 0.0              | 0.0              | 0.0              | 0.0              | 0.0              | 0.0              | 0.0              | 0.0              | 0.0              |
| Core   | Common        | 0.0           | 0.2                                                                     | 1.3              | 0.0              | 0.8              | 4.2              | 0.1              | 1.9              | 7.6              | 0.4              | 3.4              | 12.5             |                  |
|        | Low frequency | 0.0           | 0.0                                                                     | 0.4              | 0.0              | 0.0              | 0.6              | 0.0              | 0.0              | 1.0              | 0.0              | 0.3              | 1.9              |                  |
|        | Rare          | 0.0           | 0.0                                                                     | 0.0              | 0.0              | 0.0              | 0.0              | 0.0              | 0.0              | 0.0              | 0.0              | 0.0              | 0.0              |                  |

**Table S7. 25th, 50th, and 75th percentiles of the length in kilobases (kb) of consecutively well-imputed (observed imputation  $r^2>0.8$ ) variants by reference panel, genotype array, ancestry, and minor allele frequency (MAF) category.**

**Table S8. Associations of genomic features with dichotomous TOPMed imputation quality status from logistic regressions by genotype array and ancestry.** MAF refers to the model with 9 MAF categories as predictors. ALL refers to the model with 9 MAF categories and all 6 genomic features as predictors. All other models refer to a model with 9 MAF categories and the named genomic feature as predictors. The features include mean GC content (GC), number of repeats (REP), number of structural variants (SV), presence of segmental duplications (SEG), mean recombination rate (RECOMB), and distance to nearest genotyped marker (DIST).

**Table S9. Associations of repeats with dichotomous TOPMed imputation quality status from logistic regressions by genotype array and ancestry.** All model names refer to the model with 9 MAF categories and membership in the named repeat class as predictors. Repeat classes as defined by RepeatMasker include DNA repeat elements (DNA), long interspersed repeated elements (LINE), low complexity repeats (LowComplex), long terminal repeat elements including retrotransposons (LTR), rolling circle repeats (RC), RNA repeats (RNA), satellite repeats, microsatellites (Simple), short interspersed repeat elements including ALUs (SINE), and repeats of unknown class.

**Table S10. Associations of genomic features with continuous TOPMed imputation quality status from zero-one inflated beta regressions by genotype array and ancestry.** All models used the same set of predictors for each of the four parameters (see methods). MAF refers to the model with 9 MAF categories as predictors. ALL refers to the model with 9 MAF categories and all 6 genomic features as predictors. All other models refer to a model with 9 MAF categories and the named genomic feature as predictors. The features include mean GC content (GC), number of repeats (REP), number of structural variants (SV), presence of segmental duplications (SEG), mean recombination rate (RECOMB), and distance to nearest genotyped marker (DIST).



| Reference panel | Array       | Impact   | African | Hispanic/Latino | European | Finnish |
|-----------------|-------------|----------|---------|-----------------|----------|---------|
| TOPMed          | Omni 2.5M   | High     | 0.605   | 0.641           | 0.511    | 0.456   |
|                 |             | Moderate | 0.645   | 0.668           | 0.540    | 0.510   |
|                 |             | Low      | 0.706   | 0.726           | 0.603    | 0.620   |
|                 |             | Modifier | 0.719   | 0.739           | 0.621    | 0.662   |
|                 | MEGA        | High     | 0.551   | 0.593           | 0.443    | 0.387   |
|                 |             | Moderate | 0.571   | 0.608           | 0.448    | 0.416   |
|                 |             | Low      | 0.619   | 0.658           | 0.499    | 0.521   |
|                 |             | Modifier | 0.648   | 0.683           | 0.532    | 0.584   |
|                 | OmniExpress | High     | 0.589   | 0.622           | 0.483    | 0.430   |
|                 |             | Moderate | 0.626   | 0.651           | 0.508    | 0.480   |
|                 |             | Low      | 0.684   | 0.707           | 0.568    | 0.589   |
|                 |             | Modifier | 0.699   | 0.721           | 0.589    | 0.635   |
|                 | Core        | High     | 0.551   | 0.593           | 0.443    | 0.387   |
|                 |             | Moderate | 0.571   | 0.608           | 0.448    | 0.416   |
|                 |             | Low      | 0.619   | 0.658           | 0.499    | 0.521   |
|                 |             | Modifier | 0.648   | 0.683           | 0.532    | 0.584   |
| HRC             | Omni 2.5M   | High     | 0.151   | 0.181           | 0.191    | 0.392   |
|                 |             | Moderate | 0.163   | 0.191           | 0.204    | 0.442   |
|                 |             | Low      | 0.222   | 0.259           | 0.280    | 0.555   |
|                 |             | Modifier | 0.235   | 0.271           | 0.305    | 0.582   |
|                 | MEGA        | High     | 0.173   | 0.210           | 0.229    | 0.420   |
|                 |             | Moderate | 0.209   | 0.251           | 0.268    | 0.485   |
|                 |             | Low      | 0.202   | 0.238           | 0.271    | 0.555   |
|                 |             | Modifier | 0.210   | 0.246           | 0.290    | 0.579   |
|                 | OmniExpress | High     | 0.123   | 0.147           | 0.166    | 0.382   |
|                 |             | Moderate | 0.129   | 0.154           | 0.175    | 0.430   |
|                 |             | Low      | 0.174   | 0.207           | 0.243    | 0.542   |
|                 |             | Modifier | 0.188   | 0.224           | 0.270    | 0.571   |
|                 | Core        | High     | 0.081   | 0.107           | 0.139    | 0.368   |
|                 |             | Moderate | 0.074   | 0.099           | 0.133    | 0.406   |
|                 |             | Low      | 0.099   | 0.135           | 0.189    | 0.518   |
|                 |             | Modifier | 0.119   | 0.159           | 0.220    | 0.554   |
| 1000G           | Omni 2.5M   | High     | 0.162   | 0.200           | 0.148    | 0.282   |
|                 |             | Moderate | 0.170   | 0.208           | 0.152    | 0.314   |
|                 |             | Low      | 0.240   | 0.284           | 0.231    | 0.437   |
|                 |             | Modifier | 0.263   | 0.307           | 0.261    | 0.478   |
|                 | MEGA        | High     | 0.187   | 0.233           | 0.208    | 0.351   |
|                 |             | Moderate | 0.225   | 0.276           | 0.250    | 0.432   |
|                 |             | Low      | 0.216   | 0.262           | 0.224    | 0.438   |
|                 |             | Modifier | 0.232   | 0.277           | 0.246    | 0.469   |
|                 | OmniExpress | High     | 0.128   | 0.165           | 0.125    | 0.257   |
|                 |             | Moderate | 0.131   | 0.170           | 0.126    | 0.286   |
|                 |             | Low      | 0.186   | 0.232           | 0.194    | 0.405   |
|                 |             | Modifier | 0.208   | 0.256           | 0.225    | 0.450   |
|                 | Core        | High     | 0.081   | 0.120           | 0.104    | 0.235   |
|                 |             | Moderate | 0.071   | 0.110           | 0.089    | 0.238   |
|                 |             | Low      | 0.103   | 0.152           | 0.142    | 0.346   |
|                 |             | Modifier | 0.129   | 0.183           | 0.176    | 0.404   |

**Table S11. Proportion of biallelic single nucleotide variants (SNVs) in each whole genome sequencing (WGS) study that are well-imputed ( $r^2 > 0.8$ ) by reference panel, genotype array, ancestry, and predicted impact on protein coding. Predicted impact was estimated with VEP.**

| Array       | Variant type       | African | Hispanic/<br>Latino | European | Finnish |
|-------------|--------------------|---------|---------------------|----------|---------|
| Omni 2.5M   | Biallelic SNV      | 0.0014  | 0.0011              | 0.0035   | 0.0084  |
|             | Biallelic indel    | 0.0024  | 0.0014              | 0.0045   | 0.0115  |
|             | Multiallelic SNV   | 0.0016  | 0.0014              | 0.0045   | 0.0115  |
|             | Multiallelic indel | 0.0055  | 0.0035              | 0.0075   | 0.0144  |
| MEGA        | Biallelic SNV      | 0.0017  | 0.0011              | 0.0045   | 0.0095  |
|             | Biallelic indel    | 0.0024  | 0.0014              | 0.0055   | 0.0126  |
|             | Multiallelic SNV   | 0.0024  | 0.0014              | 0.0055   | 0.0126  |
|             | Multiallelic indel | 0.0065  | 0.0045              | 0.0105   | 0.0165  |
| OmniExpress | Biallelic SNV      | 0.0024  | 0.0014              | 0.0095   | 0.0126  |
|             | Biallelic indel    | 0.0035  | 0.0019              | 0.0115   | 0.0165  |
|             | Multiallelic SNV   | 0.0035  | 0.0016              | 0.0115   | 0.0164  |
|             | Multiallelic indel | 0.0074  | 0.0045              | 0.0145   | 0.0165  |
| Core        | Biallelic SNV      | 0.0084  | 0.0035              | 0.0395   | 0.0275  |
|             | Biallelic indel    | 0.0115  | 0.0045              | 0.0425   | 0.0336  |
|             | Multiallelic SNV   | 0.0105  | 0.0035              | 0.0405   | 0.0224  |
|             | Multiallelic indel | 0.0185  | 0.0075              | 0.0284   | 0.0384  |

**Table S12. Minor allele frequency (MAF) threshold above which array genotyping and imputation can approximate whole genome sequencing (WGS) with the TOPMed panel by genotype array, ancestry, and variant type.** Threshold is the smallest MAF for which >90% of variants are well-imputed (observed imputation  $r^2 > 0.8$ ).

## **ACKNOWLEDGEMENTS**

Molecular data for the Trans-Omics in Precision Medicine (TOPMed) program was supported by the National Heart, Lung and Blood Institute (NHLBI). Genome Sequencing for “NHLBI TOPMed: Whole Genome Sequencing in the BioMe Study” (phs001644) was performed at the Baylor College of Medicine Human Genome Sequencing Center and the McDonnell Genome Institute. Genome Sequencing for “NHLBI TOPMed: Whole Genome Sequencing in MLOF Study” (phs001515) was performed at the Baylor College of Medicine Human Genome Sequencing Center and New York Genome Center Genomics. Core support including centralized genomic read mapping and genotype calling, along with variant quality metrics and filtering were provided by the TOPMed Informatics Research Center (3R01HL-117626-02S1; contract HHSN268201800002I). Core support including phenotype harmonization, data management, sample-identity QC, and general program coordination were provided by the TOPMed Administrative Coordinating Center (R01HL-120393; U01HL-120393; contract HHSN268201800001I). We gratefully acknowledge the studies and participants who provided biological samples and data for TOPMed.

The Mount Sinai BioMe Biobank has been supported by The Andrea and Charles Bronfman Philanthropies and in part by Federal funds from the NHLBI and NHGRI (U01HG00638001; U01HG007417; X01HL134588). We thank all participants in the Mount Sinai Biobank. We also thank all our recruiters who have assisted and continue to assist in data collection and management and are grateful for the computational

resources and staff expertise provided by Scientific Computing at the Icahn School of Medicine at Mount Sinai.

The My Life, Our Future samples and data are made possible through the partnership of Bloodworks Northwest, the American Thrombosis and Hemostasis Network, the National Hemophilia Foundation, and Bioverativ. We gratefully acknowledge the hemophilia treatment centers and their patients who provided biological samples and phenotypic data.

Bio-samples and data for the InPSYght study were obtained from NIMH Repository & Genomics Resource, a centralized national biorepository for genetic studies of psychiatric disorders. Contributing studies include the Genomic Psychiatry Cohort, the Consortium of the Genetics of Schizophrenia, the Bipolar Genome Study, the Lithium treatment moderate dose use study, and the Systematic Treatment Enhancement Program for Bipolar Disorder. We gratefully acknowledge the participants who provided biological samples and data for these studies.

We gratefully acknowledge the participants who provided biological samples and data for the METSIM study.

We gratefully acknowledge Hyun Min Kang for his guidance in using bed-diff to calculate genotype concordance metrics and other useful discussions.

We gratefully acknowledge Corbin Quick for his script and guidance in calculating the observed imputation  $r^2$ .

This work was supported by NHGRI grant R01 HG009976 (Boehnke). S.C.H was also supported by NHGRI grant F31 HG011186.
